# Supplementary material for: Computational insights into asymmetric cross-aldol carboligation in choline chloride/ethylene glycol deep eutectic solvents
Source: Royal Society of Chemistry journal article supplement (doi:10.1039/d4cp04314f), 2025-01-01
Supplement: d4cp04314f1.pdf [file d4cp04314f1.pdf]

Supporting Information

**Computational Insight into Asymmetric Cross-Aldol  
Carboligation in Choline Chloride/Ethylene Glycol Deep  
Eutectic Solvent**

Yan Zhang<sup>1</sup>, Yong Sheng Yang<sup>2</sup>, Shi Jia Zhao<sup>1</sup>, Cui Wei<sup>1</sup>,

Ning Zou<sup>1\*</sup>, Ying Xue<sup>3\*</sup> and Wen Jun Zhou<sup>1\*</sup>

<sup>1\*</sup>College of Chemistry and Chemical Engineering, Neijiang Normal  
University, Neijiang 641112  
People's Republic of China

<sup>2</sup>School of Pharmacy and Institute of Pharmacy,  
North Sichuan Medical College, Nanchong 637100,  
People's Republic of China

<sup>3\*</sup>College of Chemistry,  
Key Lab of Green Chemistry and Technology in Ministry of Education,  
Sichuan University, Chengdu 610064,  
People's Republic of China

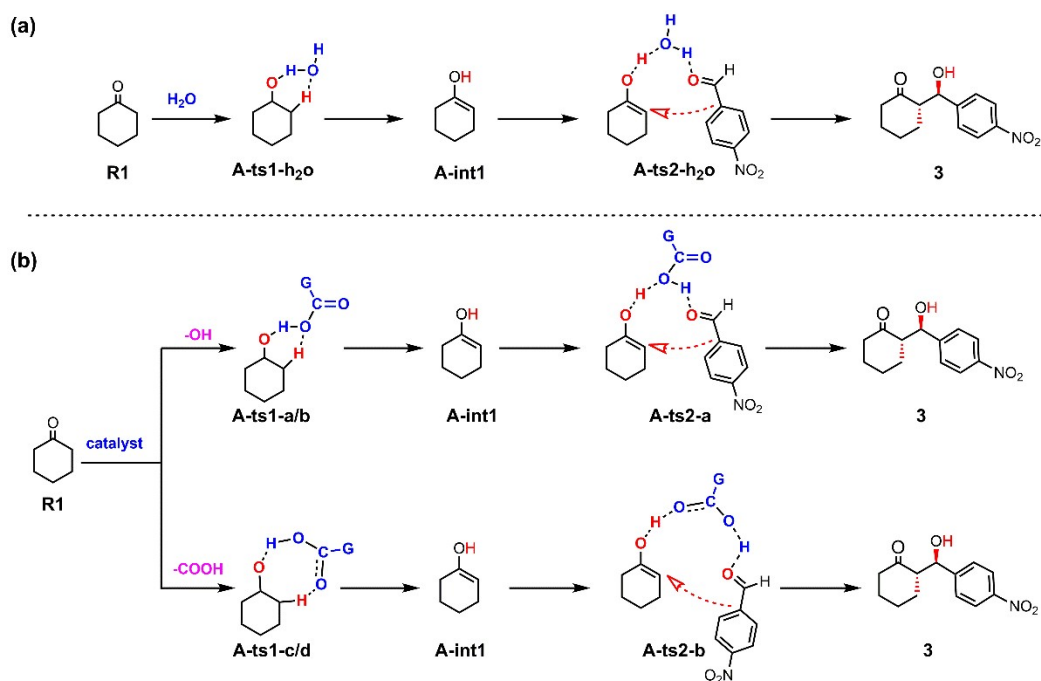

Scheme S1. The reaction mechanism involved  $\text{H}_2\text{O}$  and catalyst.

### The interaction energy analysis of A-ts1-b and A-ts1-c

The interaction energy ( $E_{\text{int}}$ ) reported in the paper is valued by following equation, the transition state is divided into two fragments, and the two distorted parts to form the transition state would release energy. Here, the BSSE correction is also adopt to calculate the  $E_{\text{int-BSSE}}$ , and the results is suggested in Figure S1. The  $E_{\text{int-BSSE}}$  for A-ts1-b, A-ts1-b is 109.1 kcal/mol and 66.3 kcal/mol respectively, there is slight difference with the  $E_{\text{int}}$  valued by the equation. This result suggests that both two methods could apply to measure the interaction energy.

$$E_{\text{int}} = E_{A-B}^{\ddagger} - E_{\text{dis-A}}^{\ddagger} - E_{\text{dis-B}}^{\ddagger}$$

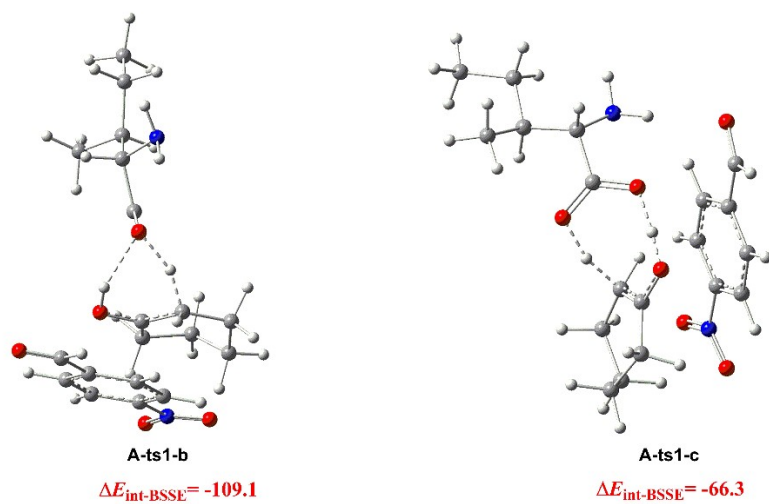

Figure S1. The interaction energy with BSSE correction for A-ts1-b and A-ts1-c.

## Coordinates

R1

0 1

|   |             |             |             |
|---|-------------|-------------|-------------|
| C | -1.00522300 | -1.25965000 | -0.28935800 |
| C | 0.38845500  | -1.28181800 | 0.35850800  |
| C | 0.38845500  | 1.28181800  | 0.35850800  |
| C | -1.00522300 | 1.25965000  | -0.28935800 |
| C | -1.77899500 | 0.00000000  | 0.10476500  |
| H | 0.27265000  | -1.35936400 | 1.44860100  |
| H | 0.99225300  | -2.12585100 | 0.01912300  |
| H | -0.89423800 | -1.28699500 | -1.38052600 |
| H | -1.55835500 | -2.15970000 | -0.00496100 |
| H | 0.27265000  | 1.35936400  | 1.44860100  |
| H | 0.99225300  | 2.12585100  | 0.01912300  |
| H | -1.55835500 | 2.15970000  | -0.00496100 |
| H | -0.89423800 | 1.28699500  | -1.38052600 |
| H | -1.94613400 | 0.00000000  | 1.19049800  |
| H | -2.76574100 | 0.00000000  | -0.36861400 |
| C | 1.15071800  | 0.00000000  | 0.07052000  |
| O | 2.28226700  | 0.00000000  | -0.35848300 |

R2

0 1

|   |             |             |             |
|---|-------------|-------------|-------------|
| C | 0.47677200  | 1.27982000  | 0.00005600  |
| C | 1.03738800  | 0.01059200  | -0.00000600 |
| C | 0.28222300  | -1.15744300 | -0.00005500 |
| C | -1.09955100 | -1.04194900 | -0.00004000 |
| C | -1.69267000 | 0.22355700  | 0.00002200  |
| C | -0.90973200 | 1.37772300  | 0.00006900  |
| H | 1.12103100  | 2.14968300  | 0.00009100  |
| H | 0.78410000  | -2.11673000 | -0.00010300 |
| H | -1.74077500 | -1.91703200 | -0.00007600 |
| H | -1.38610900 | 2.35427600  | 0.00011700  |
| N | 2.50911400  | -0.10435200 | -0.00002100 |
| O | 2.98230400  | -1.22436900 | -0.00008300 |
| O | 3.15096700  | 0.92871700  | 0.00002900  |
| C | -3.17732900 | 0.33708200  | 0.00003600  |
| O | -3.91740100 | -0.61559900 | -0.00000200 |
| H | -3.57160400 | 1.37397200  | 0.00008600  |

## Catalyst

0 1

|   |             |             |             |
|---|-------------|-------------|-------------|
| C | 3.30936500  | 0.04849800  | 0.34878800  |
| C | 1.98039700  | 0.69329500  | -0.03978100 |
| H | 4.11341200  | 0.78853800  | 0.35568900  |
| H | 3.24800100  | -0.38952800 | 1.35040900  |
| H | 3.59538400  | -0.74458700 | -0.34642200 |
| C | 0.77413100  | -0.24260900 | 0.11223600  |
| H | 1.82031900  | 1.57456800  | 0.58955800  |
| H | 2.03654800  | 1.04427800  | -1.08172900 |
| C | -0.51341300 | 0.44941100  | -0.35690500 |
| H | 0.64667800  | -0.47107700 | 1.17792000  |
| H | -0.54422500 | 0.40977200  | -1.46304600 |
| C | 0.97394300  | -1.55030000 | -0.65736200 |
| H | 0.07556100  | -2.16894700 | -0.62263100 |
| H | 1.21816700  | -1.34330600 | -1.70674000 |
| H | 1.79235200  | -2.13622400 | -0.23345800 |
| C | -1.74366700 | -0.31205700 | 0.11968600  |
| O | -1.76313300 | -1.33182700 | 0.75852900  |
| O | -2.87602400 | 0.31371100  | -0.26834800 |
| H | -3.61451600 | -0.20353900 | 0.08752900  |
| N | -0.63825100 | 1.81125700  | 0.16787400  |
| H | 0.05634600  | 2.40524700  | -0.27358700 |
| H | -1.54754900 | 2.18349800  | -0.09003400 |

## [ChCl/2 EG]

0 1

|   |            |             |             |
|---|------------|-------------|-------------|
| C | 2.10120300 | -0.21205000 | -1.79308700 |
| C | 3.17873300 | -0.67217500 | -0.81833600 |
| H | 2.34038000 | -0.56331000 | -2.80410300 |
| H | 1.15530200 | -0.66517900 | -1.48612300 |
| H | 4.15211300 | -0.25756100 | -1.11530700 |
| H | 2.95070500 | -0.30066200 | 0.19054500  |
| O | 3.28030900 | -2.07050800 | -0.85994600 |
| H | 2.51952300 | -2.40993700 | -0.35634300 |
| O | 1.90329200 | 1.20712700  | -1.79052000 |
| H | 2.73192000 | 1.62103500  | -2.05959600 |
| C | 1.65973100 | 2.36356700  | 1.15112000  |
| C | 1.09223200 | 1.02725600  | 1.59345100  |
| H | 1.72902100 | 3.07110900  | 1.98154300  |
| H | 2.67055500 | 2.20658800  | 0.75281800  |
| H | 0.14842200 | 1.20969600  | 2.14008600  |
| H | 0.84695300 | 0.46640500  | 0.68098500  |
| O | 2.00966700 | 0.30825300  | 2.36877500  |

|    |             |             |             |
|----|-------------|-------------|-------------|
| H  | 1.77572900  | -0.62863300 | 2.25280700  |
| O  | 0.79669100  | 2.92342700  | 0.16887300  |
| H  | 1.02613200  | 2.45606800  | -0.65153500 |
| N  | -2.45180700 | 0.66678700  | -0.39078800 |
| C  | -2.25702300 | -0.14878400 | 0.88049600  |
| H  | -1.18480300 | -0.15077800 | 1.08062000  |
| H  | -2.78468100 | 0.38589500  | 1.67606400  |
| C  | -2.76283600 | -1.58878800 | 0.79756700  |
| H  | -3.85806900 | -1.61216000 | 0.78569500  |
| H  | -2.42976400 | -2.06582700 | 1.72807900  |
| O  | -2.30891300 | -2.27592100 | -0.33420800 |
| H  | -1.36990100 | -2.50684000 | -0.14575000 |
| Cl | 0.51704300  | -2.15586100 | 0.80201800  |
| C  | -2.39419800 | 2.12109300  | -0.04193500 |
| H  | -2.51122800 | 2.69759700  | -0.96132300 |
| H  | -3.20690600 | 2.34925800  | 0.64853000  |
| H  | -1.41748500 | 2.34419400  | 0.39743800  |
| C  | -1.34134900 | 0.38702200  | -1.36434000 |
| H  | -1.28713900 | -0.68797300 | -1.51806000 |
| H  | -1.56436600 | 0.91715000  | -2.29219400 |
| H  | -0.41625600 | 0.76966800  | -0.93452500 |
| C  | -3.76028700 | 0.34958200  | -1.03247900 |
| H  | -4.55734700 | 0.50390000  | -0.30326700 |
| H  | -3.89749500 | 1.02143900  | -1.88059100 |
| H  | -3.73400000 | -0.68839300 | -1.36383000 |

#### A-tsl-self

0 1

|   |             |             |             |
|---|-------------|-------------|-------------|
| C | -1.01245900 | -1.34873500 | -0.20459400 |
| C | 0.47045900  | -1.21247700 | 0.09821900  |
| C | 0.31711200  | 1.37255400  | 0.20013800  |
| C | -1.12501700 | 1.18459400  | -0.30580500 |
| C | -1.76652700 | -0.09069100 | 0.25350000  |
| H | 0.85271300  | -1.79849300 | 0.93694800  |
| H | 1.86894900  | -1.17623600 | -0.38776900 |
| H | -1.17449100 | -1.48503300 | -1.28157500 |
| H | -1.42979500 | -2.23369300 | 0.28338000  |
| H | 0.30388900  | 1.63174400  | 1.26742600  |
| H | 0.84572300  | 2.16818500  | -0.32969800 |
| H | -1.71705500 | 2.06451000  | -0.03907700 |
| H | -1.11496800 | 1.12946900  | -1.40130600 |
| H | -1.76065100 | -0.04402000 | 1.35028000  |
| H | -2.81429700 | -0.14019500 | -0.06040200 |
| C | 1.05442800  | 0.07903800  | 0.08239600  |

|   |            |             |             |
|---|------------|-------------|-------------|
| O | 2.31400100 | -0.00274100 | -0.13516700 |
|---|------------|-------------|-------------|

A-ts1-cata

0 1

|   |             |             |             |
|---|-------------|-------------|-------------|
| C | -3.07157500 | -1.43506100 | -1.04759500 |
| C | -2.29071100 | -0.14267600 | -0.86625800 |
| C | -3.75115800 | 0.50728600  | 1.12217500  |
| C | -4.64206900 | -0.67844100 | 0.75363800  |
| C | -3.79528900 | -1.84146600 | 0.23663600  |
| H | -1.11274500 | -0.32340500 | -0.27574700 |
| H | -1.86363500 | 0.29484800  | -1.77116500 |
| H | -3.80950100 | -1.31854900 | -1.85195300 |
| H | -2.39003500 | -2.23053000 | -1.36504700 |
| H | -3.19763300 | 0.30331600  | 2.04874800  |
| H | -4.31666700 | 1.42608400  | 1.30363600  |
| H | -5.23379900 | -0.97609000 | 1.62360100  |
| H | -5.35139300 | -0.37591700 | -0.02646900 |
| H | -3.05950400 | -2.12389300 | 1.00087500  |
| H | -4.42117000 | -2.71932000 | 0.05228700  |
| C | -2.71345600 | 0.81567100  | 0.07865900  |
| O | -2.12792100 | 1.94881200  | 0.20917900  |
| C | 5.17422800  | -1.41082800 | 0.95246000  |
| C | 4.42348000  | -0.20744800 | 0.38586000  |
| H | 6.19589100  | -1.13832300 | 1.22916000  |
| H | 4.67414700  | -1.79030100 | 1.84980600  |
| H | 5.23424500  | -2.23045300 | 0.23190600  |
| C | 2.93023600  | -0.46892800 | 0.14755000  |
| H | 4.52177100  | 0.63327000  | 1.07911200  |
| H | 4.89108100  | 0.09924100  | -0.56264700 |
| C | 2.25146900  | 0.77082800  | -0.45835100 |
| H | 2.45754600  | -0.65902300 | 1.11963900  |
| H | 2.44339200  | 0.75921000  | -1.55014700 |
| C | 2.71791200  | -1.68481500 | -0.75791100 |
| H | 1.66559400  | -1.80055400 | -1.02085900 |
| H | 3.30036800  | -1.57682300 | -1.68166100 |
| H | 3.04054800  | -2.60592100 | -0.26680000 |
| C | 0.72609200  | 0.74225900  | -0.33412700 |
| O | 0.15262800  | -0.31036400 | 0.07165400  |
| O | 0.12425700  | 1.80119800  | -0.67136700 |
| H | -1.13867700 | 1.93797700  | -0.27308700 |
| N | 2.68799500  | 2.01404300  | 0.17603700  |
| H | 3.62850700  | 2.24088000  | -0.13040200 |
| H | 2.07903800  | 2.76052200  | -0.14718900 |

A-tsl-h<sub>2</sub>O

0 1

|   |             |             |             |
|---|-------------|-------------|-------------|
| C | -0.95770000 | -1.50735300 | -0.36146800 |
| C | 0.36376000  | -0.77685600 | -0.52094600 |
| C | -0.72609900 | 1.43216400  | 0.17653200  |
| C | -2.06148700 | 0.70414000  | 0.03514600  |
| C | -1.93027600 | -0.73549700 | 0.53196600  |
| H | 1.54250500  | -0.99635100 | 0.28880500  |
| H | 0.99968500  | -1.12803800 | -1.33734900 |
| H | -1.43126200 | -1.65611900 | -1.34174200 |
| H | -0.78813300 | -2.50928200 | 0.04823400  |
| H | -0.53338400 | 1.69038500  | 1.22601200  |
| H | -0.70189100 | 2.37865200  | -0.37300700 |
| H | -2.83958200 | 1.24446200  | 0.58235200  |
| H | -2.36399800 | 0.68993900  | -1.01932200 |
| H | -1.55957000 | -0.72836600 | 1.56591300  |
| H | -2.90517300 | -1.23201600 | 0.54367300  |
| C | 0.45494100  | 0.61715500  | -0.29730000 |
| O | 1.58081300  | 1.22149300  | -0.33068500 |
| H | 2.40423300  | 0.30930200  | 0.01023300  |
| O | 2.71884300  | -0.70744200 | 0.45924200  |
| H | 2.92049600  | -0.57749700 | 1.39415600  |

## A-tsl-a

0 1

|   |             |             |             |
|---|-------------|-------------|-------------|
| C | -2.72497900 | 0.95267100  | -0.94957200 |
| C | -2.50458900 | 0.46319600  | 0.47389600  |
| C | -4.25827800 | -1.38201800 | 0.16222800  |
| C | -4.63673300 | -0.67086900 | -1.13624100 |
| C | -3.38034000 | -0.12437600 | -1.81802300 |
| H | -1.40655800 | -0.11457200 | 0.75698900  |
| H | -2.34062900 | 1.24575100  | 1.22112900  |
| H | -3.34912800 | 1.85380900  | -0.93762400 |
| H | -1.76440500 | 1.25080200  | -1.38589900 |
| H | -3.73682800 | -2.33091900 | -0.03110700 |
| H | -5.11525100 | -1.62130100 | 0.80078800  |
| H | -5.16537800 | -1.36914800 | -1.78989300 |
| H | -5.32580600 | 0.15518700  | -0.92320700 |
| H | -2.67592100 | -0.95129300 | -1.97761200 |
| H | -3.62393000 | 0.29034100  | -2.79973100 |
| C | -3.27782700 | -0.60908300 | 0.96811800  |
| O | -3.04436300 | -1.08502000 | 2.15667300  |
| C | 1.74790300  | 2.80397200  | -0.78970700 |
| C | 0.68348800  | 2.69764000  | 0.10001600  |



|   |             |             |             |
|---|-------------|-------------|-------------|
| C | 0.73212000  | 1.92955900  | 1.25532900  |
| C | 1.89301700  | 1.21801600  | 1.52283700  |
| C | 2.97723900  | 1.30603400  | 0.65022700  |
| C | 2.90915300  | 2.10186400  | -0.49719800 |
| H | 1.64497000  | 3.41097600  | -1.68003900 |
| H | -0.12841100 | 1.86943600  | 1.90744200  |
| H | 1.95795300  | 0.56782000  | 2.38797700  |
| H | 3.76064100  | 2.15341500  | -1.17024700 |
| N | -0.56858100 | 3.40575500  | -0.21790200 |
| O | -1.45229600 | 3.39820100  | 0.62280700  |
| O | -0.65251000 | 3.94349200  | -1.30485800 |
| C | 4.20442700  | 0.50966600  | 0.93157600  |
| O | 4.30821700  | -0.23785200 | 1.87306300  |
| H | 5.03244900  | 0.64164400  | 0.20500300  |
| C | 3.04965700  | -2.21880300 | -2.90280900 |
| C | 2.77185300  | -2.08179200 | -1.40796400 |
| H | 4.12324900  | -2.28124900 | -3.09986200 |
| H | 2.58529000  | -3.12744100 | -3.29834700 |
| H | 2.65924600  | -1.37079400 | -3.47347200 |
| C | 1.28283500  | -2.02759400 | -1.05388200 |
| H | 3.21523300  | -2.92526900 | -0.86990600 |
| H | 3.25073400  | -1.16758800 | -1.02587600 |
| C | 1.10055900  | -2.31179100 | 0.45518700  |
| H | 0.76810900  | -2.84703000 | -1.57694200 |
| H | 1.81493400  | -1.70196700 | 1.02245100  |
| C | 0.63596500  | -0.70856200 | -1.47993800 |
| H | -0.45203400 | -0.75309400 | -1.36620500 |
| H | 1.00728400  | 0.11915500  | -0.86772400 |
| H | 0.84823200  | -0.48058800 | -2.52803400 |
| C | -0.31939500 | -1.91038600 | 0.85413700  |
| O | -1.27031000 | -2.59084300 | 0.47038300  |
| O | -0.44628200 | -0.78855300 | 1.51360700  |
| H | -2.09741600 | -0.88382900 | 2.37856700  |
| N | 1.37587600  | -3.72571000 | 0.69690100  |
| H | 1.45502100  | -3.89182600 | 1.69635600  |
| H | 0.55118500  | -4.24020800 | 0.38933300  |

A-tsl-b

0 1

|   |             |             |             |
|---|-------------|-------------|-------------|
| C | -0.20181400 | -2.50916800 | 1.57877600  |
| C | -0.33319700 | -1.20946300 | 0.78925100  |
| C | 0.24758100  | -2.42339300 | -1.40608800 |
| C | 0.69581100  | -3.57555000 | -0.50590600 |
| C | -0.26717400 | -3.73913500 | 0.67080500  |

|   |             |             |             |
|---|-------------|-------------|-------------|
| H | -1.14497900 | -0.53721400 | 1.08648300  |
| H | 0.54072900  | -0.32957600 | 0.94143800  |
| H | 0.75316300  | -2.50672900 | 2.11572300  |
| H | -0.99447100 | -2.55480200 | 2.32975400  |
| H | -0.63540100 | -2.70624900 | -1.99509400 |
| H | 1.02967800  | -2.09756400 | -2.09636100 |
| H | 0.75726100  | -4.49177300 | -1.09829800 |
| H | 1.70169600  | -3.34934700 | -0.13503000 |
| H | -1.29180100 | -3.85895400 | 0.29630600  |
| H | -0.02083200 | -4.63650200 | 1.24527100  |
| C | -0.14974700 | -1.23095600 | -0.61538200 |
| O | -0.23789400 | -0.11624200 | -1.28602200 |
| C | -4.11812500 | 0.18207300  | 1.17427200  |
| C | -3.60398500 | -0.34528700 | -0.00323100 |
| C | -3.36443900 | 0.41587500  | -1.14354400 |
| C | -3.65552100 | 1.77110600  | -1.09307300 |
| C | -4.17564400 | 2.32987200  | 0.07731800  |
| C | -4.40644200 | 1.54112000  | 1.20443500  |
| H | -4.27730000 | -0.46408200 | 2.02831000  |
| H | -2.95129200 | -0.05353900 | -2.02719400 |
| H | -3.48637100 | 2.41706700  | -1.94806100 |
| H | -4.81026100 | 1.99123200  | 2.10693800  |
| N | -3.27486400 | -1.78068900 | -0.03690000 |
| O | -2.88967200 | -2.24397800 | -1.09670900 |
| O | -3.38852800 | -2.41229100 | 0.99558800  |
| C | -4.48439200 | 3.78784500  | 0.11744600  |
| O | -4.31713100 | 4.52514700  | -0.82176500 |
| H | -4.88553600 | 4.16034000  | 1.08178400  |
| C | 7.44569200  | 0.94223500  | 0.00579800  |
| C | 6.09791600  | 1.50327800  | 0.45494000  |
| H | 8.26983700  | 1.43605800  | 0.52744900  |
| H | 7.50777300  | -0.12996900 | 0.22025700  |
| H | 7.60542100  | 1.07684300  | -1.06715900 |
| C | 4.89163000  | 0.73510400  | -0.09994600 |
| H | 6.04878700  | 1.48202300  | 1.54809900  |
| H | 6.02351900  | 2.55876600  | 0.14976400  |
| C | 3.57547900  | 1.37443200  | 0.36394900  |
| H | 4.91399400  | -0.28456100 | 0.30574700  |
| H | 3.37551200  | 2.24967500  | -0.28636000 |
| C | 4.92942100  | 0.65964900  | -1.62790700 |
| H | 4.01797700  | 0.20009700  | -2.01255100 |
| H | 5.02773500  | 1.66510900  | -2.05716200 |
| H | 5.77707300  | 0.06456400  | -1.97705000 |
| C | 2.37348500  | 0.43818300  | 0.17105900  |

|   |             |             |             |
|---|-------------|-------------|-------------|
| O | 2.46559500  | -0.64751900 | -0.40212900 |
| O | 1.25906400  | 0.89541300  | 0.67279000  |
| H | -0.02891900 | 0.62550200  | -0.66110400 |
| N | 3.59816600  | 1.73095500  | 1.78488700  |
| H | 4.15769200  | 2.56771500  | 1.91781500  |
| H | 2.64551500  | 1.96285000  | 2.05251300  |

A-ts1-c

01

|   |             |             |             |
|---|-------------|-------------|-------------|
| C | -1.67914300 | 1.97536100  | -1.08549300 |
| C | -0.92731700 | 1.30917600  | 0.06267700  |
| C | -2.34262200 | 2.55365000  | 1.78459300  |
| C | -2.80958200 | 3.42159700  | 0.61567300  |
| C | -3.01638600 | 2.56388600  | -0.63305400 |
| H | -0.61034500 | 0.27957400  | -0.11399900 |
| H | 0.34519400  | 1.66140000  | 0.21598000  |
| H | -1.06875900 | 2.77249500  | -1.52657200 |
| H | -1.83791700 | 1.24236600  | -1.88383600 |
| H | -3.18454800 | 1.97378600  | 2.18896800  |
| H | -1.94791600 | 3.13741600  | 2.62162800  |
| H | -3.72815400 | 3.94442100  | 0.89503500  |
| H | -2.05622000 | 4.18988900  | 0.40371200  |
| H | -3.72000000 | 1.75057500  | -0.40718800 |
| H | -3.46134400 | 3.15494000  | -1.43815000 |
| C | -1.31714900 | 1.52830900  | 1.39714800  |
| O | -0.77825800 | 0.89488100  | 2.37944300  |
| C | -3.03874100 | -1.32867700 | 0.41556700  |
| C | -2.70048500 | -1.36742100 | -0.92972100 |
| C | -1.48221200 | -1.85332400 | -1.39600100 |
| C | -0.56350700 | -2.32434100 | -0.46737200 |
| C | -0.87964400 | -2.29536500 | 0.89531000  |
| C | -2.10621000 | -1.79776000 | 1.33436500  |
| H | -4.00182900 | -0.93458600 | 0.71558300  |
| H | -1.27221500 | -1.83866600 | -2.45818400 |
| H | 0.41647700  | -2.67785100 | -0.77306300 |
| H | -2.32533100 | -1.76396100 | 2.39782400  |
| N | -3.66312800 | -0.82499600 | -1.90592400 |
| O | -3.32190100 | -0.79282700 | -3.07314700 |
| O | -4.73555700 | -0.43444300 | -1.48122800 |
| C | 0.10054700  | -2.80172500 | 1.89574900  |
| O | 1.10563400  | -3.40240800 | 1.60001400  |
| H | -0.16325900 | -2.60585100 | 2.95415000  |
| C | 6.06532100  | 0.60578300  | -2.23800500 |
| C | 5.19057400  | -0.19119000 | -1.27213900 |

|   |            |             |             |
|---|------------|-------------|-------------|
| H | 6.74379700 | -0.05402700 | -2.78454400 |
| H | 5.44799400 | 1.13462400  | -2.97180200 |
| H | 6.67422400 | 1.34849300  | -1.71662800 |
| C | 4.08608200 | 0.64288100  | -0.60888200 |
| H | 4.72523200 | -1.01617700 | -1.82129200 |
| H | 5.82395600 | -0.63911100 | -0.49130700 |
| C | 3.29857000 | -0.19526900 | 0.40766200  |
| H | 3.38056200 | 0.95840700  | -1.38752600 |
| H | 3.89601400 | -0.26034200 | 1.33673000  |
| C | 4.65958100 | 1.88598100  | 0.07605300  |
| H | 3.88879100 | 2.41530400  | 0.63897000  |
| H | 5.46505000 | 1.60436500  | 0.76569400  |
| H | 5.07414100 | 2.58547600  | -0.65350500 |
| C | 1.97260700 | 0.45527200  | 0.80772900  |
| O | 1.64495100 | 1.57437700  | 0.31535500  |
| O | 1.24490100 | -0.21362700 | 1.59792600  |
| H | 0.11063200 | 0.35677700  | 2.04504800  |
| N | 2.92986400 | -1.51479200 | -0.11697200 |
| H | 3.77387600 | -2.05871200 | -0.26971100 |
| H | 2.40487200 | -2.01109300 | 0.60021400  |

A-tsl-d

0 1

|   |             |             |             |
|---|-------------|-------------|-------------|
| C | -1.81872900 | 0.94336200  | -2.26284400 |
| C | -0.72077900 | 1.81709500  | -1.67206600 |
| C | -2.34834900 | 2.84950000  | -0.01355400 |
| C | -3.46632900 | 2.23966500  | -0.85943500 |
| C | -3.05847100 | 0.85734600  | -1.36811800 |
| H | 0.12035600  | 1.18864300  | -0.85089500 |
| H | 0.07665700  | 2.10673700  | -2.36021500 |
| H | -2.11204900 | 1.34682400  | -3.24009900 |
| H | -1.42349600 | -0.06210000 | -2.45080600 |
| H | -2.22670700 | 2.30574500  | 0.93524100  |
| H | -2.53842100 | 3.89174300  | 0.25786900  |
| H | -4.38435800 | 2.18234400  | -0.26771500 |
| H | -3.67726600 | 2.89666800  | -1.71230200 |
| H | -2.85259900 | 0.21102100  | -0.50805300 |
| H | -3.87974200 | 0.39558800  | -1.92441100 |
| C | -1.01930100 | 2.79726700  | -0.70724000 |
| O | -0.12936100 | 3.60825300  | -0.25394100 |
| C | -2.88847000 | -2.53112700 | 0.54986400  |
| C | -1.66023700 | -2.35657000 | -0.07415100 |
| C | -0.73538400 | -1.39435100 | 0.31202500  |
| C | -1.07332400 | -0.54402100 | 1.35683500  |

|   |             |             |             |
|---|-------------|-------------|-------------|
| C | -2.30878500 | -0.68671800 | 1.99626700  |
| C | -3.20489600 | -1.68370400 | 1.60507200  |
| H | -3.56157700 | -3.30505500 | 0.20345900  |
| H | 0.21315000  | -1.30006200 | -0.20188400 |
| H | -0.38720200 | 0.23682000  | 1.67072100  |
| H | -4.15889700 | -1.78396400 | 2.11553900  |
| N | -1.32716400 | -3.22458800 | -1.22027800 |
| O | -0.32547100 | -2.95302200 | -1.85524100 |
| O | -2.08051600 | -4.14898000 | -1.46036500 |
| C | -2.69776200 | 0.26152700  | 3.07379100  |
| O | -2.08147400 | 1.26824600  | 3.32976100  |
| H | -3.61936600 | -0.00464900 | 3.63115400  |
| C | 4.98440000  | -2.46282000 | 1.18781200  |
| C | 4.93063400  | -0.99585400 | 0.76639400  |
| H | 5.93064000  | -2.69258800 | 1.68398100  |
| H | 4.17450000  | -2.69283200 | 1.88818100  |
| H | 4.88679900  | -3.13569300 | 0.33204700  |
| C | 3.56457500  | -0.56709900 | 0.21627600  |
| H | 5.17092600  | -0.36675400 | 1.62898300  |
| H | 5.70112200  | -0.80731900 | 0.00301700  |
| C | 3.58873400  | 0.90435700  | -0.22626600 |
| H | 2.83066400  | -0.65128200 | 1.02868000  |
| H | 4.03658500  | 0.94601300  | -1.23876900 |
| C | 3.13092800  | -1.46081500 | -0.95035800 |
| H | 2.25389800  | -1.05920900 | -1.46285200 |
| H | 3.94183700  | -1.54839800 | -1.68401300 |
| H | 2.87906500  | -2.46937400 | -0.61281400 |
| C | 2.18781900  | 1.49539100  | -0.39248200 |
| O | 1.17792600  | 0.73768600  | -0.23041500 |
| O | 2.11399200  | 2.71354300  | -0.68926100 |
| H | 0.86127600  | 3.29667000  | -0.52119400 |
| N | 4.27571500  | 1.77084900  | 0.73108100  |
| H | 5.27710500  | 1.61508100  | 0.67420300  |
| H | 4.10883600  | 2.73515700  | 0.45607300  |

A-tsl-a-h<sub>2</sub>O

0 1

|   |            |             |             |
|---|------------|-------------|-------------|
| C | 1.84986200 | 0.91460300  | 0.66900400  |
| C | 1.84961400 | -0.20327100 | -0.36096200 |
| C | 4.04461800 | -1.13166900 | 0.58826500  |
| C | 4.15132400 | 0.18756100  | 1.35011600  |
| C | 2.77161900 | 0.61125800  | 1.85216900  |
| H | 0.87896900 | -1.22809900 | -0.47067900 |
| H | 1.52094200 | 0.09793900  | -1.35962500 |

|   |             |             |             |
|---|-------------|-------------|-------------|
| H | 2.16596900  | 1.85657400  | 0.20056200  |
| H | 0.83257800  | 1.08888800  | 1.04232600  |
| H | 3.88528000  | -1.96921600 | 1.28014600  |
| H | 4.95369300  | -1.37383000 | 0.02850700  |
| H | 4.86009900  | 0.08312500  | 2.17657000  |
| H | 4.54540300  | 0.96642500  | 0.68594800  |
| H | 2.34508600  | -0.20035700 | 2.45704800  |
| H | 2.84623600  | 1.48916600  | 2.50032200  |
| C | 2.90258500  | -1.15055800 | -0.39603100 |
| O | 2.85216300  | -2.15699500 | -1.18549900 |
| C | -2.31115000 | 1.66406500  | 0.64775700  |
| C | -1.47887500 | 1.35289700  | -0.42057100 |
| C | -1.48922000 | 0.12027700  | -1.06209700 |
| C | -2.36514100 | -0.85017200 | -0.59692300 |
| C | -3.21702100 | -0.56566800 | 0.47211700  |
| C | -3.19423500 | 0.68718100  | 1.08843500  |
| H | -2.24892600 | 2.64186400  | 1.10796300  |
| H | -0.81315100 | -0.07891700 | -1.88308700 |
| H | -2.39191500 | -1.83484000 | -1.05094600 |
| H | -3.86287100 | 0.89304800  | 1.91979700  |
| N | -0.51515000 | 2.37339300  | -0.87273300 |
| O | 0.16757000  | 2.11060200  | -1.84561700 |
| O | -0.45249000 | 3.40792300  | -0.23630400 |
| C | -4.14720200 | -1.61499800 | 0.97048800  |
| O | -4.19538300 | -2.73315500 | 0.51927800  |
| H | -4.80769600 | -1.30207200 | 1.80540400  |
| O | 0.48212100  | -2.20501200 | -1.14947400 |
| H | 1.66152700  | -2.32083200 | -1.37330700 |
| H | 0.20231400  | -2.93855400 | -0.58749100 |

A-ts1-b-h<sub>2</sub>O

0 1

|   |            |             |             |
|---|------------|-------------|-------------|
| C | 2.73973900 | -0.11414000 | 1.59300900  |
| C | 1.60496100 | 0.68500000  | 0.96529400  |
| C | 2.92495300 | 0.95856800  | -1.20718600 |
| C | 4.13041000 | 0.45017300  | -0.41523700 |
| C | 3.70464800 | -0.66405800 | 0.53992600  |
| H | 0.59556800 | 0.38200400  | 1.25689400  |
| H | 1.11509500 | 1.98107200  | 1.39705700  |
| H | 3.30335800 | 0.50655500  | 2.30225400  |
| H | 2.32004400 | -0.94239300 | 2.17167800  |
| H | 2.64178000 | 0.22304300  | -1.97100900 |
| H | 3.12841400 | 1.89558900  | -1.73401200 |
| H | 4.90307900 | 0.10262400  | -1.10723100 |

|   |             |             |             |
|---|-------------|-------------|-------------|
| H | 4.56860400  | 1.27431800  | 0.16273800  |
| H | 3.20419900  | -1.45788900 | -0.02825700 |
| H | 4.57847900  | -1.10931000 | 1.02586900  |
| C | 1.68872800  | 1.15465000  | -0.36546100 |
| O | 0.74769300  | 1.85879400  | -0.87814300 |
| C | -1.62829000 | -1.68951800 | 0.82647700  |
| C | -0.87739300 | -1.26161300 | -0.26126700 |
| C | -1.31618300 | -0.30061100 | -1.16555800 |
| C | -2.56981200 | 0.25770300  | -0.96037100 |
| C | -3.35078700 | -0.15622800 | 0.12086400  |
| C | -2.88386700 | -1.12556800 | 1.00993100  |
| H | -1.22296400 | -2.43592300 | 1.49762900  |
| H | -0.67135900 | 0.01307100  | -1.97574600 |
| H | -2.96042800 | 1.02151100  | -1.62403900 |
| H | -3.50326300 | -1.43535700 | 1.84706500  |
| N | 0.46053700  | -1.84634600 | -0.45254400 |
| O | 1.03929400  | -1.59989100 | -1.49532100 |
| O | 0.90775400  | -2.53858200 | 0.44302500  |
| C | -4.69447900 | 0.44881100  | 0.33040600  |
| O | -5.17096800 | 1.28540200  | -0.39670600 |
| H | -5.24631100 | 0.07473100  | 1.21745900  |
| O | 0.26147300  | 2.84076700  | 1.23449800  |
| H | 0.26220200  | 2.47197200  | 0.15491700  |
| H | 0.64202600  | 3.72786600  | 1.25075700  |

A-ts2-a

0 1

|   |             |             |             |
|---|-------------|-------------|-------------|
| C | -0.82066100 | -1.07735900 | 1.91302600  |
| C | -0.02691900 | -1.00535400 | 0.62379500  |
| C | -1.46126300 | -2.82241000 | -0.40898900 |
| C | -1.98830800 | -3.11238900 | 0.99721700  |
| C | -2.16034700 | -1.80624500 | 1.76992700  |
| H | 1.05396300  | 0.40589800  | -1.65780000 |
| H | 0.99318400  | -0.63792000 | 0.71715600  |
| H | -0.20656700 | -1.59325300 | 2.66216600  |
| H | -0.97826600 | -0.06704200 | 2.30816000  |
| H | -2.22851100 | -2.29301400 | -0.99387700 |
| H | -1.21073300 | -3.72913800 | -0.96550500 |
| H | -2.93626300 | -3.65227700 | 0.92944400  |
| H | -1.28229100 | -3.76591300 | 1.52334800  |
| H | -2.88179000 | -1.17329900 | 1.23968800  |
| H | -2.57677400 | -1.99936000 | 2.76261400  |
| C | -0.24785800 | -1.94534600 | -0.37968000 |
| O | 0.51820800  | -2.06328600 | -1.42384000 |

|   |             |             |             |
|---|-------------|-------------|-------------|
| C | 7.60278300  | 1.22301600  | 1.29859000  |
| C | 6.73925800  | 0.62978600  | 0.18714500  |
| H | 8.64778600  | 1.29379700  | 0.98609500  |
| H | 7.26107000  | 2.23099700  | 1.55623300  |
| H | 7.57005800  | 0.61691200  | 2.20760800  |
| C | 5.23477200  | 0.67088400  | 0.48388800  |
| H | 6.92417900  | 1.18210400  | -0.73941600 |
| H | 7.04282100  | -0.41330700 | 0.00749600  |
| C | 4.43685000  | 0.01973500  | -0.65360000 |
| H | 4.92059400  | 1.72098700  | 0.53642500  |
| H | 4.49067300  | -1.08012700 | -0.52157200 |
| C | 4.90617900  | -0.01237000 | 1.81320600  |
| H | 3.82697500  | -0.06126300 | 1.96813700  |
| H | 5.31219200  | -1.03187400 | 1.83004900  |
| H | 5.33663300  | 0.53144700  | 2.65739800  |
| C | 2.94627000  | 0.36498000  | -0.58580400 |
| O | 2.45070400  | 1.03782200  | 0.30846900  |
| O | 2.24887100  | -0.13714400 | -1.58043600 |
| H | 1.30299300  | -1.42990200 | -1.42099200 |
| N | 4.89762100  | 0.44832200  | -1.97525700 |
| H | 5.78547400  | 0.00467600  | -2.18803300 |
| H | 4.22665300  | 0.11822500  | -2.66326600 |
| C | -3.89017600 | 1.58905700  | 0.93918600  |
| C | -4.69416400 | 1.02879700  | -0.04361300 |
| C | -4.18039700 | 0.40942500  | -1.17775900 |
| C | -2.80238200 | 0.32755400  | -1.31410200 |
| C | -1.96471100 | 0.84446700  | -0.31835200 |
| C | -2.51159000 | 1.49641700  | 0.79032800  |
| H | -4.34760100 | 2.08331300  | 1.78687500  |
| H | -4.85927000 | 0.01398300  | -1.92286500 |
| H | -2.35175500 | -0.12581000 | -2.19122800 |
| H | -1.85627100 | 1.94178700  | 1.53240300  |
| N | -6.15696000 | 1.10950200  | 0.11341400  |
| O | -6.84199300 | 0.61412500  | -0.76134700 |
| O | -6.58393400 | 1.66200900  | 1.10955800  |
| C | -0.49560700 | 0.71086400  | -0.45568500 |
| O | -0.04415300 | 0.58076200  | -1.65911400 |
| H | 0.12422500  | 1.24924600  | 0.26749800  |

A-ts2-b

0 1

|   |            |            |             |
|---|------------|------------|-------------|
| C | 0.79563300 | 1.52299100 | 1.83655500  |
| C | 0.03646900 | 0.94588900 | 0.65727400  |
| C | 1.32197500 | 2.43565900 | -0.95235500 |



|   |             |             |             |
|---|-------------|-------------|-------------|
| C | 1.75594400  | 3.24973200  | 0.26784000  |
| C | 2.04810200  | 2.31284600  | 1.43752700  |
| H | -1.19436000 | -1.69194400 | -0.56309100 |
| H | -0.97284700 | 0.59764300  | 0.86907200  |
| H | 0.11855200  | 2.18193000  | 2.39463400  |
| H | 1.06560200  | 0.71864500  | 2.53306000  |
| H | 2.16324800  | 1.82705500  | -1.31316200 |
| H | 1.00026700  | 3.06210200  | -1.78812600 |
| H | 2.63793400  | 3.84532800  | 0.01823300  |
| H | 0.95946200  | 3.95221000  | 0.54139400  |
| H | 2.85169600  | 1.62707900  | 1.14609600  |
| H | 2.40990100  | 2.87701900  | 2.30198800  |
| C | 0.19299300  | 1.50710100  | -0.61724400 |
| O | -0.55890600 | 1.17850800  | -1.61106000 |
| C | -7.64041200 | 0.96330700  | 0.63137000  |
| C | -6.66821300 | -0.21020500 | 0.73362700  |
| H | -8.47664700 | 0.83837900  | 1.32380400  |
| H | -7.13764700 | 1.90411200  | 0.87904000  |
| H | -8.05549600 | 1.06128900  | -0.37476900 |
| C | -5.37828300 | -0.01336700 | -0.07374800 |
| H | -6.40249800 | -0.35867000 | 1.78505800  |
| H | -7.16997800 | -1.12928300 | 0.39379000  |
| C | -4.47671100 | -1.25195000 | 0.02770600  |
| H | -4.82533000 | 0.82796200  | 0.36304900  |
| H | -4.85575000 | -2.01116300 | -0.68367300 |
| C | -5.67875900 | 0.29642800  | -1.54232800 |
| H | -4.76259500 | 0.32283300  | -2.13432300 |
| H | -6.34609700 | -0.46572200 | -1.96360500 |
| H | -6.17006300 | 1.26613400  | -1.65019300 |
| C | -3.04299700 | -0.96570500 | -0.41421300 |
| O | -2.71089600 | 0.13974900  | -0.86841500 |
| O | -2.23839600 | -1.95841000 | -0.25210400 |
| H | -1.37695500 | 0.61782700  | -1.32686100 |
| N | -4.37801500 | -1.76222500 | 1.39800400  |
| H | -5.26284500 | -2.18266000 | 1.66422300  |
| H | -3.68551100 | -2.50594900 | 1.40743700  |
| C | 4.28656800  | -0.94980700 | 1.20907900  |
| C | 4.86020400  | -0.73498800 | -0.03652100 |
| C | 4.10920900  | -0.61484800 | -1.20074700 |
| C | 2.72721800  | -0.69303700 | -1.10321700 |
| C | 2.11710400  | -0.86704700 | 0.14371200  |
| C | 2.90086400  | -1.02009400 | 1.28988800  |
| H | 4.92254200  | -1.06215100 | 2.07802800  |
| H | 4.61406900  | -0.47227200 | -2.14808300 |

|   |            |             |             |
|---|------------|-------------|-------------|
| H | 2.09438900 | -0.62871200 | -1.98326400 |
| H | 2.42614400 | -1.20497500 | 2.24898500  |
| N | 6.32658900 | -0.64855200 | -0.13043700 |
| O | 6.80826900 | -0.45609600 | -1.23120100 |
| O | 6.96371500 | -0.77064300 | 0.89938400  |
| C | 0.62758400 | -0.93694000 | 0.21814700  |
| O | 0.00756800 | -1.32523700 | -0.83274600 |
| H | 0.25301000 | -1.25737900 | 1.20330400  |

A-ts2-h<sub>2</sub>O

0 1

|   |             |             |             |
|---|-------------|-------------|-------------|
| C | -1.65225300 | 1.62186600  | 1.46965400  |
| C | -2.25630300 | 0.47683200  | 0.66850600  |
| C | -1.40911100 | 1.53592100  | -1.49405900 |
| C | -1.14421000 | 2.81205300  | -0.69336700 |
| C | -0.62133700 | 2.44961200  | 0.69401900  |
| H | -3.26608900 | -2.14059800 | 0.18144900  |
| H | -3.19047400 | 0.09298400  | 1.07710400  |
| H | -2.46107200 | 2.28590500  | 1.79966100  |
| H | -1.19950800 | 1.22406100  | 2.38718700  |
| H | -0.45980000 | 1.01355600  | -1.68195700 |
| H | -1.86846200 | 1.72640200  | -2.46694600 |
| H | -0.42601100 | 3.43853900  | -1.22873300 |
| H | -2.07217500 | 3.39025000  | -0.60508000 |
| H | 0.31144600  | 1.88578300  | 0.58319700  |
| H | -0.38250300 | 3.35257000  | 1.26354400  |
| C | -2.29502800 | 0.58238000  | -0.74740700 |
| O | -3.00742400 | -0.18863300 | -1.47464600 |
| O | -4.21693500 | -1.88063300 | -0.21691000 |
| H | -3.63914700 | -0.88674500 | -0.92634800 |
| C | 2.33640500  | -0.18412300 | 1.30210300  |
| C | 2.75119200  | -0.42656900 | 0.00003400  |
| C | 1.89966200  | -0.92860400 | -0.97863300 |
| C | 0.57769100  | -1.17552500 | -0.63639400 |
| C | 0.11739600  | -0.90141200 | 0.65559100  |
| C | 1.00645200  | -0.43145800 | 1.62412000  |
| H | 3.04931200  | 0.18176600  | 2.03024400  |
| H | 2.28535600  | -1.12110200 | -1.97212100 |
| H | -0.12444700 | -1.59325200 | -1.35192800 |
| H | 0.65942300  | -0.26571400 | 2.64015400  |
| N | 4.15312000  | -0.15639900 | -0.35394500 |
| O | 4.49490700  | -0.37097300 | -1.50234100 |
| O | 4.88324100  | 0.26996800  | 0.52220400  |
| C | -1.32972700 | -1.16765000 | 0.97644100  |

|   |             |             |            |
|---|-------------|-------------|------------|
| O | -1.88119300 | -2.12055900 | 0.31603400 |
| H | -1.51787000 | -1.08600000 | 2.06506400 |
| H | -4.83555800 | -1.65691700 | 0.48475300 |

B-ts-1

0 1

|   |             |             |             |
|---|-------------|-------------|-------------|
| C | 2.19109600  | -0.91066200 | -1.82307400 |
| C | 1.27273200  | -1.64512200 | -0.86855800 |
| C | 3.18543300  | -3.17318200 | -0.13938200 |
| C | 3.95238100  | -2.65427600 | -1.35567100 |
| C | 3.67831200  | -1.16560600 | -1.56443100 |
| H | 0.31704100  | -1.27309200 | 0.38970000  |
| H | 0.25686100  | -1.75171500 | -1.26903800 |
| H | 1.97780700  | -1.22525700 | -2.85560000 |
| H | 1.98834700  | 0.17175800  | -1.81364500 |
| H | 3.57588000  | -2.71752200 | 0.78221500  |
| H | 3.28478800  | -4.25392000 | -0.01467300 |
| H | 5.02500000  | -2.83885500 | -1.24072500 |
| H | 3.62915500  | -3.20365700 | -2.24890100 |
| H | 4.01473000  | -0.62908900 | -0.66554300 |
| H | 4.27182500  | -0.77277600 | -2.39647100 |
| C | 1.69140100  | -2.87138400 | -0.22488400 |
| O | 0.89434200  | -3.63896700 | 0.32498500  |
| C | 1.90905100  | 2.98317700  | -0.49517600 |
| C | 0.68585300  | 3.42088600  | -0.00889200 |
| C | -0.02406400 | 2.75117500  | 0.98382300  |
| C | 0.50295900  | 1.57844900  | 1.49544800  |
| C | 1.72133400  | 1.08138300  | 0.99161500  |
| C | 2.43278100  | 1.80649500  | 0.02102600  |
| H | 2.42326700  | 3.56042700  | -1.25283700 |
| H | -0.96136600 | 3.15783400  | 1.34246700  |
| H | -0.03358100 | 1.05893700  | 2.28230800  |
| H | 3.39362700  | 1.44292600  | -0.32937100 |
| N | 0.12170500  | 4.67022700  | -0.55604300 |
| O | -0.94757600 | 5.03876000  | -0.11201800 |
| O | 0.76614800  | 5.24269000  | -1.41375900 |
| C | 2.33443500  | -0.12506700 | 1.51951200  |
| O | 1.81242700  | -0.91635800 | 2.35363000  |
| H | 3.39533000  | -0.28703400 | 1.31584800  |
| C | -5.92932600 | -1.16895700 | -1.30781300 |
| C | -4.47390700 | -1.60945900 | -1.16529800 |
| H | -6.46419000 | -1.81534800 | -2.00794600 |
| H | -6.44497700 | -1.22061600 | -0.34327400 |
| H | -6.01064300 | -0.14328700 | -1.67650800 |

|   |             |             |             |
|---|-------------|-------------|-------------|
| C | -3.71084700 | -0.86440800 | -0.06341800 |
| H | -4.44679900 | -2.68004000 | -0.94077300 |
| H | -3.95293200 | -1.46597000 | -2.12437800 |
| C | -2.24575800 | -1.32189000 | -0.02082000 |
| H | -4.15703300 | -1.12649700 | 0.90416900  |
| H | -1.70934500 | -0.79473300 | -0.84034800 |
| C | -3.78023000 | 0.65246700  | -0.25483600 |
| H | -3.15064500 | 1.17263000  | 0.47042500  |
| H | -3.44969400 | 0.92725300  | -1.26423500 |
| H | -4.79954100 | 1.02223000  | -0.12547000 |
| C | -1.56779500 | -0.85433100 | 1.25856300  |
| O | -2.05906300 | -0.24718200 | 2.17195700  |
| O | -0.26073300 | -1.21385800 | 1.31052000  |
| H | 0.73989200  | -0.99260100 | 2.16619200  |
| N | -2.09901400 | -2.77212000 | -0.06424200 |
| H | -2.32784500 | -3.11378100 | -0.99144200 |
| H | -1.14320200 | -3.07377600 | 0.14094300  |

B-ts-2

0 1

|   |             |             |             |
|---|-------------|-------------|-------------|
| C | 0.78438300  | 2.26980700  | -0.49701000 |
| C | 0.39705300  | 1.21241800  | 0.53272900  |
| C | -1.68893200 | 2.68985500  | 1.08408000  |
| C | -1.21183700 | 3.68507800  | 0.02459400  |
| C | -0.44159700 | 2.97014100  | -1.08350200 |
| H | -0.69089600 | 0.30076500  | 0.14897400  |
| H | 1.22931600  | 0.87539700  | 1.14637200  |
| H | 1.42778600  | 3.02632700  | -0.02703300 |
| H | 1.37735500  | 1.82602800  | -1.30456800 |
| H | -2.50212500 | 2.07964600  | 0.66772000  |
| H | -2.08442000 | 3.17894400  | 1.97733200  |
| H | -2.06970400 | 4.23102900  | -0.37959800 |
| H | -0.55262900 | 4.42980100  | 0.48765700  |
| H | -1.08840600 | 2.23100200  | -1.57858100 |
| H | -0.13195300 | 3.68375000  | -1.85314800 |
| C | -0.62955100 | 1.69642900  | 1.54797900  |
| O | -0.64621400 | 1.25246700  | 2.67671100  |
| C | 4.09546200  | -1.29335300 | 1.09193600  |
| C | 4.99901100  | -0.81206200 | 0.15109200  |
| C | 4.61021700  | -0.27060300 | -1.06552800 |
| C | 3.25245800  | -0.20652600 | -1.35361500 |
| C | 2.32075400  | -0.67472800 | -0.42338900 |
| C | 2.74404200  | -1.21929800 | 0.79464200  |
| H | 4.46058100  | -1.70620800 | 2.02351200  |

|   |             |             |             |
|---|-------------|-------------|-------------|
| H | 5.36358300  | 0.08098200  | -1.75888400 |
| H | 2.90268200  | 0.18713300  | -2.30127500 |
| H | 2.00793300  | -1.56852200 | 1.51352900  |
| N | 6.43972000  | -0.88594700 | 0.45980300  |
| O | 7.21271600  | -0.45206700 | -0.37269900 |
| O | 6.75792500  | -1.37585500 | 1.52629700  |
| C | 0.88103900  | -0.62681200 | -0.73668600 |
| O | 0.55729400  | -0.29683500 | -1.93518000 |
| H | 0.22695300  | -1.28919200 | -0.16653400 |
| C | -6.42832500 | -2.36196200 | 1.45473500  |
| C | -5.84893200 | -1.68969700 | 0.21149100  |
| H | -7.37297300 | -2.85833100 | 1.21914400  |
| H | -5.73973000 | -3.12063700 | 1.84143200  |
| H | -6.62316600 | -1.64696700 | 2.25735000  |
| C | -4.41777100 | -1.16163000 | 0.39781200  |
| H | -5.84697400 | -2.40884500 | -0.61199900 |
| H | -6.50204500 | -0.85560400 | -0.08850800 |
| C | -3.92851500 | -0.49608200 | -0.91170300 |
| H | -3.76650000 | -2.02433200 | 0.59405700  |
| H | -4.29413800 | 0.55303800  | -0.89694300 |
| C | -4.34236300 | -0.19723600 | 1.58494300  |
| H | -3.33401100 | 0.18460500  | 1.74500600  |
| H | -5.02145600 | 0.65068300  | 1.42653700  |
| H | -4.64934400 | -0.69612300 | 2.50674500  |
| C | -2.41399100 | -0.34561300 | -0.98372000 |
| O | -1.77165500 | -0.24649000 | 0.11677100  |
| O | -1.87188000 | -0.29051300 | -2.11167800 |
| H | -0.52006700 | -0.30438700 | -2.07305100 |
| N | -4.34704100 | -1.23078900 | -2.09786000 |
| H | -5.33141100 | -1.06713100 | -2.27746300 |
| H | -3.82413400 | -0.89011400 | -2.89843700 |

B-ts-h<sub>2</sub>O

0 1

|   |             |             |             |
|---|-------------|-------------|-------------|
| C | -2.99011200 | -0.49450000 | 1.83815900  |
| C | -2.06295200 | -0.48761900 | 0.64000800  |
| C | -3.93943400 | -1.16237300 | -0.91554500 |
| C | -4.73654900 | -1.49679600 | 0.34380500  |
| C | -4.46650800 | -0.46138200 | 1.43405300  |
| H | -2.83641000 | 1.26498000  | 0.00198500  |
| H | -0.99974700 | -0.55805700 | 0.85816100  |
| H | -2.81340800 | -1.39647400 | 2.44469100  |
| H | -2.77096100 | 0.35210700  | 2.50228900  |
| H | -4.37844700 | -0.28558400 | -1.41661800 |

|   |             |             |             |
|---|-------------|-------------|-------------|
| H | -3.97349000 | -1.97032800 | -1.65165700 |
| H | -5.80526800 | -1.55686600 | 0.11408900  |
| H | -4.43292100 | -2.48524300 | 0.71146100  |
| H | -4.72938800 | 0.53740100  | 1.05671900  |
| H | -5.09831000 | -0.64195500 | 2.30936000  |
| C | -2.45926700 | -0.87656600 | -0.65051900 |
| O | -1.68226100 | -0.91462500 | -1.65152900 |
| C | 2.58501100  | -0.98824700 | -0.57047300 |
| C | 3.53089900  | -0.18318500 | 0.04955100  |
| C | 3.27741600  | 1.11821000  | 0.47450700  |
| C | 2.01059600  | 1.63642500  | 0.26646800  |
| C | 1.03636300  | 0.84618000  | -0.36276100 |
| C | 1.31503200  | -0.46541500 | -0.77837000 |
| H | 2.85090700  | -1.99358400 | -0.87088700 |
| H | 4.06522200  | 1.68638500  | 0.95196900  |
| H | 1.76265900  | 2.64524600  | 0.57772300  |
| H | 0.51333300  | -1.04291100 | -1.23822000 |
| N | 4.88293600  | -0.73650100 | 0.27550800  |
| O | 5.69770000  | -0.01413700 | 0.81714400  |
| O | 5.08918700  | -1.87514400 | -0.09575600 |
| C | -0.30067200 | 1.34688300  | -0.60966100 |
| O | -0.61154100 | 2.53082700  | -0.25480500 |
| H | -0.97156000 | 0.72181300  | -1.21970000 |
| O | -3.02371100 | 2.17812600  | -0.36683900 |
| H | -1.64824000 | 2.61472200  | -0.38987900 |
| H | -3.46845300 | 2.03378800  | -1.21109400 |

#### R1R2-A

0 1

|   |             |             |             |
|---|-------------|-------------|-------------|
| C | 1.42468500  | -0.78619200 | 2.16981600  |
| C | 2.00822800  | -0.93864200 | 0.77005600  |
| C | -0.00977100 | -2.32847500 | 0.04168000  |
| C | -0.41782100 | -2.34615300 | 1.51617900  |
| C | -0.08676100 | -1.00958000 | 2.17866900  |
| H | 2.51295900  | -0.05491500 | 0.37401800  |
| H | 3.17967700  | -1.59855100 | 0.66486100  |
| H | 1.89503000  | -1.49360200 | 2.86410700  |
| H | 1.66247500  | 0.21303800  | 2.54972400  |
| H | -0.74603300 | -1.75554000 | -0.54735800 |
| H | 0.03903800  | -3.32597000 | -0.40791300 |
| H | -1.49138400 | -2.55540700 | 1.59493100  |
| H | 0.10284100  | -3.15285700 | 2.04665400  |
| H | -0.57583200 | -0.21046200 | 1.60433300  |
| H | -0.49218900 | -0.96239500 | 3.19269000  |

|   |             |             |             |
|---|-------------|-------------|-------------|
| C | 1.28142000  | -1.61957900 | -0.22273000 |
| O | 1.69251400  | -1.68752100 | -1.44499700 |
| C | 0.14334900  | 1.62212600  | -0.46268700 |
| C | 0.79896400  | 2.21612100  | 0.60375000  |
| C | 2.14786200  | 2.57153300  | 0.58042800  |
| C | 2.86315500  | 2.32981100  | -0.58207100 |
| C | 2.22393700  | 1.73320200  | -1.67881000 |
| C | 0.87870400  | 1.37601900  | -1.61849000 |
| H | -0.89772200 | 1.32907200  | -0.39312400 |
| H | 2.60657600  | 3.00810100  | 1.45907300  |
| H | 3.92372700  | 2.55249700  | -0.64822700 |
| H | 0.39203600  | 0.88291500  | -2.45622700 |
| N | 0.04151500  | 2.42199600  | 1.84081200  |
| O | 0.64952500  | 2.69024000  | 2.85735700  |
| O | -1.17792600 | 2.29408300  | 1.78827700  |
| C | 2.99284200  | 1.47298100  | -2.92672800 |
| O | 4.10976000  | 1.89058600  | -3.12367800 |
| H | 2.45900700  | 0.87308100  | -3.69009800 |
| C | 9.27322400  | -0.51396800 | 1.71281700  |
| C | 8.35099800  | -0.17626400 | 0.54297600  |
| H | 10.10492500 | 0.19282600  | 1.77164000  |
| H | 8.72667900  | -0.46853200 | 2.66077000  |
| H | 9.69700700  | -1.51708000 | 1.61997100  |
| C | 7.06395900  | -1.01131400 | 0.51139800  |
| H | 8.07867500  | 0.88229800  | 0.60329100  |
| H | 8.89603900  | -0.31600600 | -0.40317000 |
| C | 6.21715000  | -0.66976600 | -0.72276800 |
| H | 6.46777800  | -0.75498800 | 1.39616000  |
| H | 6.64902600  | -1.20027400 | -1.59288000 |
| C | 7.36931900  | -2.51107800 | 0.53542400  |
| H | 6.45904200  | -3.09772100 | 0.40068800  |
| H | 8.07436600  | -2.76932700 | -0.26472100 |
| H | 7.81834300  | -2.81047700 | 1.48546800  |
| C | 4.77273500  | -1.16566400 | -0.60820100 |
| O | 4.41588500  | -1.83198300 | 0.41309000  |
| O | 3.99784300  | -0.83097100 | -1.54258700 |
| H | 2.67862400  | -1.29839500 | -1.52421100 |
| N | 6.10739700  | 0.77593200  | -0.94533000 |
| H | 7.01406500  | 1.14070600  | -1.22170900 |
| H | 5.48658400  | 0.93345700  | -1.73729800 |
| C | -4.53964400 | 2.91338700  | -1.49030300 |
| C | -3.11019800 | 2.98875100  | -0.97237700 |
| H | -4.68730500 | 3.63976800  | -2.29765200 |
| H | -4.71485800 | 1.91091800  | -1.89285400 |

|    |             |             |             |
|----|-------------|-------------|-------------|
| H  | -2.92308900 | 3.97277300  | -0.52074100 |
| H  | -2.97800800 | 2.22449800  | -0.19222000 |
| O  | -2.20478500 | 2.82519800  | -2.03238100 |
| H  | -2.20917800 | 1.87180500  | -2.23415400 |
| O  | -5.50620200 | 3.10844700  | -0.45400500 |
| H  | -5.37210600 | 3.98584900  | -0.07671900 |
| C  | -4.30652500 | 1.36587500  | 2.22156100  |
| C  | -3.30147100 | 0.26659000  | 2.52417900  |
| H  | -4.90136300 | 1.57163400  | 3.12206700  |
| H  | -3.76148300 | 2.28330500  | 1.95852900  |
| H  | -3.84368600 | -0.65803900 | 2.76235100  |
| H  | -2.70336400 | 0.08281600  | 1.61655300  |
| O  | -2.51190600 | 0.58041700  | 3.64460000  |
| H  | -1.92003100 | 1.29800700  | 3.37604900  |
| O  | -5.12928400 | 0.94336500  | 1.14704000  |
| H  | -5.38591100 | 1.73278200  | 0.63098100  |
| N  | -5.97289000 | -2.09639500 | -0.27793800 |
| C  | -4.55000600 | -2.31409200 | 0.21589900  |
| H  | -4.10507700 | -1.31711400 | 0.27594400  |
| H  | -4.62938500 | -2.74411600 | 1.21966500  |
| C  | -3.71900500 | -3.24723600 | -0.66807100 |
| H  | -4.04315700 | -4.28414000 | -0.52647100 |
| H  | -2.69013900 | -3.17493400 | -0.28985400 |
| O  | -3.79914000 | -2.97101300 | -2.03720400 |
| H  | -3.28700700 | -2.14394900 | -2.18363500 |
| Cl | -2.56412600 | -0.24708600 | -1.60559000 |
| C  | -6.80984900 | -1.64617000 | 0.87809400  |
| H  | -7.81899600 | -1.44861100 | 0.51237100  |
| H  | -6.83382800 | -2.44449100 | 1.62113900  |
| H  | -6.36352800 | -0.73395700 | 1.28104100  |
| C  | -5.98440000 | -1.00960100 | -1.31769900 |
| H  | -5.38599300 | -1.34066900 | -2.16207600 |
| H  | -7.02323600 | -0.83325100 | -1.60320600 |
| H  | -5.53579200 | -0.12411500 | -0.86731800 |
| C  | -6.55225100 | -3.34484700 | -0.85349600 |
| H  | -6.50610900 | -4.13327400 | -0.10019000 |
| H  | -7.59199900 | -3.14600200 | -1.11694800 |
| H  | -5.97596600 | -3.61666400 | -1.73692900 |

#### R1R2-B

0 1

|   |             |             |             |
|---|-------------|-------------|-------------|
| C | -1.26694700 | -0.49473400 | -1.61765500 |
| C | -2.14244400 | -0.75702200 | -0.39511000 |
| C | -0.49310800 | -2.48442800 | 0.49623700  |



|   |             |             |             |
|---|-------------|-------------|-------------|
| C | 0.07374400  | -2.48537600 | -0.92208200 |
| C | 0.14708500  | -1.05295900 | -1.45084500 |
| H | -2.69763000 | 0.10154000  | -0.01423500 |
| H | -3.28392000 | -1.38403400 | -0.63850100 |
| H | -1.72276900 | -0.94447400 | -2.50771000 |
| H | -1.23658000 | 0.58288800  | -1.81531000 |
| H | 0.24993800  | -2.05898800 | 1.18708100  |
| H | -0.73856500 | -3.48367300 | 0.86851300  |
| H | 1.06043100  | -2.95400200 | -0.94510700 |
| H | -0.57121900 | -3.08046500 | -1.58011400 |
| H | 0.70982000  | -0.43765100 | -0.72993200 |
| H | 0.69530800  | -1.02698500 | -2.39610800 |
| C | -1.71132500 | -1.62022800 | 0.63190900  |
| O | -2.37980500 | -1.76623400 | 1.72129000  |
| C | -0.91625100 | 1.70837000  | 1.54530900  |
| C | -1.36679200 | 2.41309800  | 0.43671200  |
| C | -2.70751000 | 2.72117100  | 0.21788400  |
| C | -3.63717800 | 2.31013200  | 1.16311600  |
| C | -3.20789200 | 1.60551000  | 2.29329000  |
| C | -1.86019400 | 1.30094800  | 2.48091600  |
| H | 0.13639200  | 1.47980300  | 1.65489900  |
| H | -2.99827600 | 3.25138600  | -0.68046000 |
| H | -4.70001100 | 2.48051600  | 1.01929700  |
| H | -1.55049200 | 0.72997600  | 3.35141800  |
| N | -0.38726800 | 2.80296700  | -0.58370300 |
| O | -0.78276000 | 3.36607700  | -1.58129400 |
| O | 0.78857200  | 2.52436300  | -0.37351300 |
| C | -4.20288200 | 1.16523100  | 3.31371500  |
| O | -5.34833100 | 1.54478000  | 3.32899000  |
| H | -3.81344300 | 0.46920700  | 4.08275100  |
| C | -9.05495500 | -0.17929200 | -2.88544400 |
| C | -8.44164300 | -0.01837800 | -1.49576200 |
| H | -9.88481900 | 0.51732200  | -3.02793100 |
| H | -8.31023200 | 0.02251600  | -3.66260100 |
| H | -9.43945000 | -1.18949600 | -3.04572200 |
| C | -7.15493200 | -0.83006500 | -1.29258200 |
| H | -8.21833100 | 1.04073500  | -1.33143100 |
| H | -9.18025400 | -0.31465000 | -0.73536100 |
| C | -6.63110300 | -0.68471500 | 0.14459600  |
| H | -6.38666900 | -0.42558500 | -1.96367500 |
| H | -7.20990500 | -1.37275400 | 0.78988800  |
| C | -7.37217200 | -2.30962500 | -1.62052100 |
| H | -6.49286900 | -2.90281600 | -1.36464300 |
| H | -8.23245200 | -2.70033500 | -1.06295500 |

|    |             |             |             |
|----|-------------|-------------|-------------|
| H  | -7.57055000 | -2.45465200 | -2.68489400 |
| C  | -5.16969300 | -1.11767600 | 0.28484800  |
| O  | -4.56975900 | -1.63723300 | -0.69997400 |
| O  | -4.62816200 | -0.88847800 | 1.40624900  |
| H  | -3.38095300 | -1.33849200 | 1.61714200  |
| N  | -6.67569800 | 0.70083500  | 0.62385900  |
| H  | -7.64480300 | 0.99608900  | 0.69574200  |
| H  | -6.30445100 | 0.72530900  | 1.57122600  |
| C  | 3.69634300  | -1.68896100 | 1.90946500  |
| C  | 4.79310000  | -2.74427800 | 1.99042700  |
| H  | 3.17073200  | -1.62428200 | 2.86972200  |
| H  | 4.16846800  | -0.72510200 | 1.70541900  |
| H  | 4.35017200  | -3.71993400 | 2.23770200  |
| H  | 5.29130800  | -2.83958300 | 1.01585800  |
| O  | 5.68889500  | -2.40890200 | 3.01425000  |
| H  | 6.27338200  | -1.72373100 | 2.64364000  |
| O  | 2.76128700  | -1.93214000 | 0.84627300  |
| H  | 2.46803800  | -2.84944200 | 0.92423500  |
| C  | 4.19659300  | -2.74837300 | -1.88286700 |
| C  | 5.40349800  | -1.91620200 | -1.49151200 |
| H  | 4.33407200  | -3.24071000 | -2.84859100 |
| H  | 4.03915600  | -3.52769500 | -1.12423100 |
| H  | 5.66054800  | -1.24914800 | -2.33407200 |
| H  | 5.09663800  | -1.28349400 | -0.64671000 |
| O  | 6.48139300  | -2.72706800 | -1.11742900 |
| H  | 7.01229500  | -2.19283700 | -0.50139900 |
| O  | 3.06492700  | -1.89315500 | -1.99107600 |
| H  | 2.82866200  | -1.67413300 | -1.07361700 |
| N  | 4.12403100  | 2.00240100  | -1.23709800 |
| C  | 5.58726200  | 1.73530500  | -1.54374500 |
| H  | 5.76627200  | 0.69151400  | -1.28265300 |
| H  | 5.71138600  | 1.87529000  | -2.62200200 |
| C  | 6.57312700  | 2.63236100  | -0.79270700 |
| H  | 6.53925600  | 3.65157400  | -1.19258300 |
| H  | 7.56723400  | 2.22357200  | -1.01709900 |
| O  | 6.33602000  | 2.71225400  | 0.58374900  |
| H  | 6.62982400  | 1.85343000  | 0.96476500  |
| Cl | 6.91266500  | -0.26256000 | 0.96165300  |
| C  | 3.28337000  | 1.45078900  | -2.34722700 |
| H  | 2.23628300  | 1.62374900  | -2.09126700 |
| H  | 3.53725700  | 1.97550300  | -3.26929900 |
| H  | 3.47590000  | 0.37792900  | -2.44054600 |
| C  | 3.72748300  | 1.29633500  | 0.02843200  |
| H  | 4.41978700  | 1.58835300  | 0.81398300  |

|   |            |            |             |
|---|------------|------------|-------------|
| H | 2.69976000 | 1.57376300 | 0.26009800  |
| H | 3.79582400 | 0.22522400 | -0.15954900 |
| C | 3.85800000 | 3.46539700 | -1.09306100 |
| H | 4.20981200 | 3.97225700 | -1.99349300 |
| H | 2.78222300 | 3.59976900 | -0.97874700 |
| H | 4.39598800 | 3.82189600 | -0.21486700 |

RIC-A

01

|   |             |             |             |
|---|-------------|-------------|-------------|
| C | 2.49355200  | -1.55541700 | -2.29428500 |
| C | 1.97267900  | -1.09737000 | -0.93607000 |
| C | 0.82295800  | -3.34365500 | -0.55218700 |
| C | 1.04469100  | -3.58431400 | -2.04288500 |
| C | 2.42415900  | -3.07368700 | -2.46423100 |
| H | 2.65622900  | -0.48688700 | -0.34495900 |
| H | 1.15768900  | -0.03043300 | -1.02335200 |
| H | 1.90902400  | -1.08234200 | -3.09290100 |
| H | 3.52333600  | -1.20276100 | -2.42350800 |
| H | 1.46346700  | -4.01453700 | 0.04181100  |
| H | -0.20469100 | -3.52906700 | -0.23087400 |
| H | 0.93370100  | -4.65004100 | -2.26129000 |
| H | 0.26716900  | -3.05101800 | -2.60303800 |
| H | 3.19754600  | -3.54669600 | -1.84258600 |
| H | 2.63885400  | -3.34667300 | -3.50158000 |
| C | 1.22459500  | -1.96724800 | -0.12808300 |
| O | 0.85573500  | -1.62949900 | 1.06913100  |
| C | 4.59489700  | -2.27400800 | 0.87336700  |
| C | 5.20233400  | -1.30066400 | 0.09256200  |
| C | 5.09003500  | 0.06277100  | 0.34995700  |
| C | 4.33080300  | 0.46929500  | 1.44065800  |
| C | 3.70344700  | -0.49398800 | 2.23865400  |
| C | 3.83327600  | -1.85400100 | 1.95754800  |
| H | 4.71125000  | -3.31918300 | 0.61550700  |
| H | 5.57083400  | 0.77165400  | -0.31255600 |
| H | 4.16063600  | 1.52253600  | 1.65323200  |
| H | 3.31322500  | -2.58282600 | 2.57302800  |
| N | 5.95244000  | -1.73573700 | -1.09948300 |
| O | 6.42302000  | -0.87058400 | -1.81436100 |
| O | 6.04490100  | -2.93288700 | -1.30059300 |
| C | 2.86175300  | -0.07376100 | 3.39289200  |
| O | 2.83678900  | 1.04993400  | 3.83430600  |
| H | 2.24979200  | -0.88264400 | 3.84183900  |
| C | 3.03432200  | 5.96612000  | -1.50178100 |
| C | 2.49787200  | 5.15602800  | -0.32311900 |

|   |             |             |             |
|---|-------------|-------------|-------------|
| H | 3.63120900  | 6.81240800  | -1.15212100 |
| H | 3.67469200  | 5.34577900  | -2.13789300 |
| H | 2.23110600  | 6.36519800  | -2.12641600 |
| C | 1.82586600  | 3.83569400  | -0.72791400 |
| H | 3.32283000  | 4.92881300  | 0.35742400  |
| H | 1.77587400  | 5.76724400  | 0.24075200  |
| C | 1.29833200  | 3.08967900  | 0.51713000  |
| H | 2.58995800  | 3.19689900  | -1.19254700 |
| H | 0.30185900  | 3.50404400  | 0.76824600  |
| C | 0.70938300  | 4.08116700  | -1.74379700 |
| H | 0.20587700  | 3.14956300  | -1.99935600 |
| H | -0.02552800 | 4.78705400  | -1.33195500 |
| H | 1.10281700  | 4.51491500  | -2.66641600 |
| C | 1.03971600  | 1.59961700  | 0.25951700  |
| O | 0.81010200  | 1.21135800  | -0.92898800 |
| O | 1.08700800  | 0.83625200  | 1.25644700  |
| H | 0.95612900  | -0.59191800 | 1.17968200  |
| N | 2.24578100  | 3.16867200  | 1.62747500  |
| H | 2.20711600  | 4.08767100  | 2.05552600  |
| H | 1.98614200  | 2.48964100  | 2.33876100  |
| C | -3.64895200 | -1.70854300 | 2.16048000  |
| C | -3.10375300 | -3.00744400 | 1.57986800  |
| H | -3.29908400 | -1.59125500 | 3.19331700  |
| H | -3.25254500 | -0.87865400 | 1.56702800  |
| H | -3.50679300 | -3.86277900 | 2.13882000  |
| H | -3.41825200 | -3.10811200 | 0.53177200  |
| O | -1.70739300 | -3.03224800 | 1.72872200  |
| H | -1.34498100 | -2.36282100 | 1.12200700  |
| O | -5.07610200 | -1.61427300 | 2.09943100  |
| H | -5.44181400 | -2.33790200 | 2.62166100  |
| C | -6.27711400 | -2.13617100 | -0.78902900 |
| C | -4.91050400 | -1.73130300 | -1.30886300 |
| H | -6.96090800 | -2.38945400 | -1.60338500 |
| H | -6.16335600 | -3.02267200 | -0.15217400 |
| H | -5.03717300 | -0.94125400 | -2.07263200 |
| H | -4.36185000 | -1.28886800 | -0.46450400 |
| O | -4.22018100 | -2.83800500 | -1.81462600 |
| H | -3.27956000 | -2.58869600 | -1.79442900 |
| O | -6.84095300 | -1.04753900 | -0.06678700 |
| H | -6.40503800 | -1.07953900 | 0.79955400  |
| N | -4.67196000 | 2.23334600  | -0.22044500 |
| C | -3.62852900 | 1.71030200  | -1.20066800 |
| H | -3.71113300 | 0.62172100  | -1.19628400 |
| H | -3.91616900 | 2.09655900  | -2.18327900 |

|    |             |             |             |
|----|-------------|-------------|-------------|
| C  | -2.19229200 | 2.11017800  | -0.88895200 |
| H  | -2.04888200 | 3.19137300  | -0.99390500 |
| H  | -1.57027600 | 1.61489500  | -1.64370100 |
| O  | -1.79576200 | 1.74293200  | 0.40753300  |
| H  | -1.52158600 | 0.80357000  | 0.33352200  |
| Cl | -1.70513700 | -1.10009100 | -0.87095600 |
| C  | -6.02466800 | 2.08139900  | -0.84273400 |
| H  | -6.76841200 | 2.47392900  | -0.14728700 |
| H  | -6.04933100 | 2.64431600  | -1.77624000 |
| H  | -6.21698900 | 1.01764000  | -1.00619200 |
| C  | -4.66541400 | 1.43310900  | 1.05083100  |
| H  | -3.67118600 | 1.49464500  | 1.48647600  |
| H  | -5.42684200 | 1.84955700  | 1.71314200  |
| H  | -4.92170200 | 0.40526400  | 0.79869700  |
| C  | -4.41601000 | 3.66436700  | 0.10544500  |
| H  | -4.35359500 | 4.23492800  | -0.82269800 |
| H  | -5.24073300 | 4.03224000  | 0.71697700  |
| H  | -3.47834800 | 3.73012500  | 0.65710000  |

#### R1C-B

0 1

|   |            |             |             |
|---|------------|-------------|-------------|
| C | 2.28927700 | -1.98045900 | -1.60307000 |
| C | 1.94298600 | -1.07954300 | -0.42460600 |
| C | 1.19758200 | -3.08639600 | 0.96403300  |
| C | 1.33989800 | -3.90619900 | -0.32056700 |
| C | 2.52543400 | -3.42318400 | -1.15652800 |
| H | 2.57063100 | -0.19822000 | -0.28700600 |
| H | 0.89760300 | -0.30643600 | -0.62618900 |
| H | 1.47320600 | -1.95696500 | -2.33476500 |
| H | 3.17116700 | -1.58278700 | -2.11597800 |
| H | 1.89457000 | -3.44216700 | 1.73600800  |
| H | 0.19114800 | -3.18526400 | 1.38787300  |
| H | 1.43790000 | -4.96342700 | -0.06197700 |
| H | 0.41655700 | -3.81234400 | -0.90279000 |
| H | 3.44870000 | -3.47282400 | -0.56254700 |
| H | 2.67077400 | -4.07095900 | -2.02534000 |
| C | 1.52103700 | -1.63356700 | 0.79469700  |
| O | 1.33411600 | -0.89190700 | 1.84112900  |
| C | 5.03876400 | -0.90715700 | 0.95787400  |
| C | 5.22265600 | -0.43303700 | -0.33318300 |
| C | 4.86603700 | 0.85206100  | -0.73254700 |
| C | 4.29607600 | 1.70041200  | 0.20888500  |
| C | 4.10241100 | 1.24672500  | 1.51860000  |
| C | 4.46830100 | -0.04743600 | 1.88954600  |

|   |             |             |             |
|---|-------------|-------------|-------------|
| H | 5.32931900  | -1.92087900 | 1.20369000  |
| H | 5.01697100  | 1.15320000  | -1.76173900 |
| H | 3.95474400  | 2.69543400  | -0.06261000 |
| H | 4.29437500  | -0.38621700 | 2.90704900  |
| N | 5.76503800  | -1.36215600 | -1.34282300 |
| O | 5.87837700  | -0.94908900 | -2.48096800 |
| O | 6.04890600  | -2.48718000 | -0.97471900 |
| C | 3.49998800  | 2.14491500  | 2.54098200  |
| O | 3.28202400  | 3.31891700  | 2.36447100  |
| H | 3.27196600  | 1.65916000  | 3.51211100  |
| C | -1.28352600 | 5.08198700  | -3.26315600 |
| C | -0.51158400 | 4.81126200  | -1.97325600 |
| H | -1.12048400 | 6.10626200  | -3.60745000 |
| H | -0.95734600 | 4.40326700  | -4.05789700 |
| H | -2.35841800 | 4.94229900  | -3.12747200 |
| C | -0.56696900 | 3.34329100  | -1.53037100 |
| H | 0.53468500  | 5.09871100  | -2.12355600 |
| H | -0.91099000 | 5.44654900  | -1.16814700 |
| C | 0.14657300  | 3.14243700  | -0.18502000 |
| H | -0.03304800 | 2.74156800  | -2.27652400 |
| H | -0.54575400 | 3.45972500  | 0.61932800  |
| C | -2.01340600 | 2.84901300  | -1.42894900 |
| H | -2.06854600 | 1.87147600  | -0.94717300 |
| H | -2.62296200 | 3.54651700  | -0.84160800 |
| H | -2.47624500 | 2.72890900  | -2.41127800 |
| C | 0.45950900  | 1.67459900  | 0.09681700  |
| O | 0.17114800  | 0.79371900  | -0.75780400 |
| O | 1.02296800  | 1.42675200  | 1.21221300  |
| H | 1.27873900  | 0.18198700  | 1.54887300  |
| N | 1.44653200  | 3.81808300  | -0.11718900 |
| H | 1.30604600  | 4.81997700  | -0.20399500 |
| H | 1.84819800  | 3.66598800  | 0.80585500  |
| C | -1.89005700 | -0.71910900 | -2.20285000 |
| C | -3.09072900 | -1.10090700 | -3.05754100 |
| H | -1.22163400 | -0.05580900 | -2.76229300 |
| H | -2.25063500 | -0.16722600 | -1.33411300 |
| H | -2.75889500 | -1.63878100 | -3.95689800 |
| H | -3.76088100 | -1.76978900 | -2.49753400 |
| O | -3.74035700 | 0.07067700  | -3.47682500 |
| H | -4.25557500 | 0.38239900  | -2.71061900 |
| O | -1.15975100 | -1.84730900 | -1.69251900 |
| H | -0.93437000 | -2.41554500 | -2.43959200 |
| C | -3.15291000 | -3.89911100 | -0.22118700 |
| C | -4.14866600 | -2.77129600 | -0.01762200 |

|    |             |             |             |
|----|-------------|-------------|-------------|
| H  | -3.49657600 | -4.83745800 | 0.22132500  |
| H  | -3.01395100 | -4.06157200 | -1.29853100 |
| H  | -4.40893200 | -2.71529300 | 1.05628900  |
| H  | -3.63978200 | -1.83789200 | -0.28126500 |
| O  | -5.28344100 | -2.92904600 | -0.82282200 |
| H  | -5.65424100 | -2.03635000 | -0.92373500 |
| O  | -1.92678900 | -3.54116200 | 0.40831900  |
| H  | -1.53771700 | -2.87195400 | -0.18374600 |
| N  | -2.31374700 | -0.21192400 | 2.65443000  |
| C  | -3.81751600 | -0.01888800 | 2.70996200  |
| H  | -4.22623900 | -0.59135000 | 1.87358800  |
| H  | -4.15634900 | -0.44744000 | 3.65833700  |
| C  | -4.27461700 | 1.44015100  | 2.61484300  |
| H  | -4.05397800 | 1.96462800  | 3.55102400  |
| H  | -5.36658500 | 1.39693500  | 2.50932900  |
| O  | -3.67577500 | 2.16395400  | 1.57744900  |
| H  | -4.07865600 | 1.83187300  | 0.74101900  |
| Cl | -4.97337300 | 0.37908800  | -0.53279300 |
| C  | -1.96360500 | -1.56757400 | 3.17925700  |
| H  | -0.87707700 | -1.67108400 | 3.13110100  |
| H  | -2.31158400 | -1.65123400 | 4.20956500  |
| H  | -2.42511300 | -2.32160700 | 2.53725800  |
| C  | -1.84028900 | -0.15406800 | 1.23407900  |
| H  | -2.07907800 | 0.82749000  | 0.83549700  |
| H  | -0.77199500 | -0.34070600 | 1.24481000  |
| H  | -2.35664900 | -0.93172300 | 0.67889300  |
| C  | -1.59078500 | 0.83160200  | 3.43989400  |
| H  | -1.93800100 | 0.79945800  | 4.47429100  |
| H  | -0.52328300 | 0.61394600  | 3.38361300  |
| H  | -1.79577600 | 1.80126200  | 2.98671000  |

## R2C-A

0 1

|   |             |             |             |
|---|-------------|-------------|-------------|
| C | -5.69323500 | 1.10222100  | 0.93127300  |
| C | -4.27840200 | 0.54544800  | 1.05443200  |
| C | -4.92108300 | -0.77281700 | 3.14507600  |
| C | -6.18925200 | 0.08070200  | 3.16101100  |
| C | -6.70562000 | 0.28620400  | 1.73667700  |
| H | -3.76696600 | 0.34802200  | 0.11058700  |
| H | -3.31909700 | 1.40786400  | 1.38914500  |
| H | -5.72359700 | 2.14470200  | 1.27106400  |
| H | -5.98015700 | 1.12148100  | -0.12584500 |
| H | -5.17417400 | -1.82750400 | 2.96735600  |
| H | -4.37504700 | -0.74812500 | 4.09296100  |

|   |             |             |             |
|---|-------------|-------------|-------------|
| H | -6.94310800 | -0.39769700 | 3.79227600  |
| H | -5.97048800 | 1.05792700  | 3.60862600  |
| H | -6.85530900 | -0.69098000 | 1.25676800  |
| H | -7.67667200 | 0.78915900  | 1.74588700  |
| C | -3.96763800 | -0.41072300 | 2.04176300  |
| O | -2.82448700 | -0.99263800 | 2.09304000  |
| C | -4.71773300 | -2.31678200 | -0.74071700 |
| C | -5.17072400 | -1.31792500 | -1.59114300 |
| C | -4.31696100 | -0.49937800 | -2.32626300 |
| C | -2.94877200 | -0.70049100 | -2.20555200 |
| C | -2.46674800 | -1.70421900 | -1.35859500 |
| C | -3.34378700 | -2.50157600 | -0.62505000 |
| H | -5.43154800 | -2.91582600 | -0.18895400 |
| H | -4.73260000 | 0.27741900  | -2.95577000 |
| H | -2.23229000 | -0.06886600 | -2.72207600 |
| H | -2.94957900 | -3.25876900 | 0.04644400  |
| N | -6.62200600 | -1.08477000 | -1.68216600 |
| O | -7.00256000 | -0.15716800 | -2.37254400 |
| O | -7.35470200 | -1.82937800 | -1.05487700 |
| C | -0.99572900 | -1.92475100 | -1.24495200 |
| O | -0.20622400 | -1.43357300 | -2.01835600 |
| H | -0.65746000 | -2.58830300 | -0.42751200 |
| C | 0.23933400  | 5.91977500  | -1.15845300 |
| C | 0.35758500  | 4.39702200  | -1.15689600 |
| H | 0.72041300  | 6.34941300  | -2.04135600 |
| H | -0.81184100 | 6.22732000  | -1.16812900 |
| H | 0.70642500  | 6.36644100  | -0.27639700 |
| C | -0.45634500 | 3.71758900  | -0.04749700 |
| H | 0.01262700  | 4.01321700  | -2.12231500 |
| H | 1.41326600  | 4.10244700  | -1.06255200 |
| C | -0.22903700 | 2.19710300  | -0.04142600 |
| H | -1.52060800 | 3.89393100  | -0.24914000 |
| H | 0.69654900  | 1.98166700  | 0.52655200  |
| C | -0.11722900 | 4.29487500  | 1.32902900  |
| H | -0.60157000 | 3.72300900  | 2.12235400  |
| H | 0.96872100  | 4.26913900  | 1.49320600  |
| H | -0.44226900 | 5.33429000  | 1.42067100  |
| C | -1.32701000 | 1.44509200  | 0.70929000  |
| O | -2.20578700 | 2.09168000  | 1.35768700  |
| O | -1.30800700 | 0.18553200  | 0.61479700  |
| H | -2.11628500 | -0.50109100 | 1.39891600  |
| N | -0.18932700 | 1.62036800  | -1.38633700 |
| H | 0.63458000  | 1.98265100  | -1.86056100 |
| H | -0.02497600 | 0.61917800  | -1.28250700 |



|    |            |             |             |
|----|------------|-------------|-------------|
| C  | 3.99969300 | -3.02067900 | -1.48394400 |
| C  | 2.94182700 | -3.65952200 | -0.59205900 |
| H  | 3.89194700 | -3.39044900 | -2.51072800 |
| H  | 3.82472000 | -1.94130000 | -1.48780000 |
| H  | 3.06663500 | -4.75078200 | -0.58489500 |
| H  | 3.05928300 | -3.29940800 | 0.43925400  |
| O  | 1.67007600 | -3.38669300 | -1.11866900 |
| H  | 1.52299100 | -2.42758600 | -1.03035700 |
| O  | 5.33699100 | -3.21904800 | -1.01536600 |
| H  | 5.50799600 | -4.16811800 | -1.00054700 |
| C  | 5.82747000 | -2.67578600 | 2.03080100  |
| C  | 4.64480100 | -1.72537200 | 2.01640800  |
| H  | 6.27104200 | -2.76179800 | 3.02614300  |
| H  | 5.48452400 | -3.67162100 | 1.72232400  |
| H  | 4.95162400 | -0.77461200 | 2.49038100  |
| H  | 4.41729800 | -1.51625600 | 0.96256500  |
| O  | 3.52588000 | -2.28213900 | 2.64808900  |
| H  | 2.75472800 | -1.83599600 | 2.25883300  |
| O  | 6.82490200 | -2.17440300 | 1.14893500  |
| H  | 6.51646700 | -2.42922600 | 0.26378700  |
| N  | 5.79782500 | 1.39208800  | -0.38147600 |
| C  | 4.73781300 | 1.66241300  | 0.67731300  |
| H  | 4.37287100 | 0.68553400  | 0.99783100  |
| H  | 5.24725500 | 2.16140100  | 1.50699800  |
| C  | 3.56274200 | 2.51723700  | 0.20471700  |
| H  | 3.87234000 | 3.55608000  | 0.04581400  |
| H  | 2.84757800 | 2.51406500  | 1.03942700  |
| O  | 2.98189100 | 2.05942900  | -0.98499800 |
| H  | 2.50542000 | 1.22358600  | -0.74493000 |
| Cl | 2.10119200 | -0.50215900 | 0.30326300  |
| C  | 7.07144000 | 1.00834500  | 0.30560700  |
| H  | 7.81913000 | 0.78977100  | -0.45883100 |
| H  | 7.40242400 | 1.84344500  | 0.92391400  |
| H  | 6.89739600 | 0.10900400  | 0.90429400  |
| C  | 5.38586000 | 0.23861900  | -1.25295100 |
| H  | 4.39699900 | 0.44633700  | -1.65474300 |
| H  | 6.12939900 | 0.13370000  | -2.04530500 |
| H  | 5.37372200 | -0.65846100 | -0.63421800 |
| C  | 6.02078700 | 2.59686300  | -1.23222600 |
| H  | 6.26854700 | 3.44252200  | -0.58857700 |
| H  | 6.85036800 | 2.38932100  | -1.90906900 |
| H  | 5.10659500 | 2.79190900  | -1.79282100 |

R2C-B

0 1

|   |             |             |             |
|---|-------------|-------------|-------------|
| C | 5.66910000  | 1.24339400  | -0.73505700 |
| C | 4.40591000  | 0.43495000  | -1.01291700 |
| C | 5.66318200  | -1.06245400 | -2.65451500 |
| C | 6.79826200  | -0.04132400 | -2.55839400 |
| C | 6.93454800  | 0.48065400  | -1.12720900 |
| H | 3.75286600  | 0.26997000  | -0.15458800 |
| H | 3.41273100  | 1.09217700  | -1.59925100 |
| H | 5.63990700  | 2.19192900  | -1.28423100 |
| H | 5.69580100  | 1.51509000  | 0.32567200  |
| H | 5.98132600  | -2.02770700 | -2.23464700 |
| H | 5.35886000  | -1.26847600 | -3.68516000 |
| H | 7.72833800  | -0.50013100 | -2.90380600 |
| H | 6.59108200  | 0.80186000  | -3.22800900 |
| H | 7.08605100  | -0.36142600 | -0.43755000 |
| H | 7.81115800  | 1.12749400  | -1.03607700 |
| C | 4.44571000  | -0.68504600 | -1.86332700 |
| O | 3.41858700  | -1.44415800 | -2.03930500 |
| C | 5.15220200  | -1.81578300 | 1.46246000  |
| C | 5.00824700  | -0.61856700 | 2.14927500  |
| C | 3.77501300  | -0.02747700 | 2.40689300  |
| C | 2.62866700  | -0.66293800 | 1.94468300  |
| C | 2.74909600  | -1.86844600 | 1.24271000  |
| C | 3.99932600  | -2.44148600 | 1.00462000  |
| H | 6.14121100  | -2.22338500 | 1.29447100  |
| H | 3.73444800  | 0.91826900  | 2.93288000  |
| H | 1.64938200  | -0.20693800 | 2.06646800  |
| H | 4.06970400  | -3.36924600 | 0.44349100  |
| N | 6.23344100  | 0.08706700  | 2.57537400  |
| O | 6.09630600  | 1.16026800  | 3.12932200  |
| O | 7.29958900  | -0.44522700 | 2.32866600  |
| C | 1.54959400  | -2.55511500 | 0.71231800  |
| O | 0.40897400  | -2.22389100 | 0.95273200  |
| H | 1.75938500  | -3.42852300 | 0.06310100  |
| C | -0.70280600 | 5.19208300  | 0.53943600  |
| C | -0.84414900 | 3.68113600  | 0.36101800  |
| H | -1.36647700 | 5.55869300  | 1.32712400  |
| H | 0.32289600  | 5.45463000  | 0.81840800  |
| H | -0.95059800 | 5.73312900  | -0.37659700 |
| C | 0.18801400  | 3.08475700  | -0.60617700 |
| H | -0.73295100 | 3.19621400  | 1.33780000  |
| H | -1.84782400 | 3.45181100  | -0.02446200 |
| C | 0.06936600  | 1.55120100  | -0.69854900 |
| H | 1.18765900  | 3.31265300  | -0.21300400 |

|    |             |             |             |
|----|-------------|-------------|-------------|
| H  | -0.72626500 | 1.32546100  | -1.43109300 |
| C  | 0.03786400  | 3.69417600  | -2.00273200 |
| H  | 0.71500900  | 3.21891500  | -2.71435300 |
| H  | -0.99270100 | 3.55757300  | -2.35016200 |
| H  | 0.26304300  | 4.76317600  | -1.99695200 |
| C  | 1.33658500  | 0.90864200  | -1.26132400 |
| O  | 2.23823400  | 1.63085100  | -1.77414000 |
| O  | 1.42069700  | -0.35399600 | -1.15502900 |
| H  | 2.52346500  | -0.97887300 | -1.63460900 |
| N  | -0.16354100 | 0.91966200  | 0.60635700  |
| H  | -1.10505700 | 1.11915500  | 0.93981800  |
| H  | -0.07919700 | -0.08911200 | 0.50919400  |
| C  | -4.21494000 | 1.12244300  | 2.20604700  |
| C  | -5.56088300 | 1.81983900  | 2.04996900  |
| H  | -3.88662500 | 1.16609700  | 3.25068200  |
| H  | -4.34658200 | 0.07510200  | 1.92571100  |
| H  | -5.47999500 | 2.86852900  | 2.36732500  |
| H  | -5.86507000 | 1.81018200  | 0.99425300  |
| O  | -6.50329900 | 1.19307300  | 2.87840300  |
| H  | -6.75344500 | 0.36929800  | 2.42374900  |
| O  | -3.19898700 | 1.65956100  | 1.34336300  |
| H  | -3.04769300 | 2.58230900  | 1.58521400  |
| C  | -4.32987900 | 2.18233600  | -1.63658800 |
| C  | -5.21711000 | 0.96616200  | -1.45065100 |
| H  | -4.44731500 | 2.63051400  | -2.62599900 |
| H  | -4.59262200 | 2.93894400  | -0.88495600 |
| H  | -5.06609100 | 0.28447500  | -2.30677400 |
| H  | -4.86210500 | 0.44904500  | -0.54652300 |
| O  | -6.55884700 | 1.33490000  | -1.30393800 |
| H  | -6.97258000 | 0.62541500  | -0.78172100 |
| O  | -2.97082700 | 1.77751700  | -1.50461700 |
| H  | -2.86102000 | 1.60696600  | -0.55366500 |
| N  | -2.72452000 | -2.33634600 | -0.80287000 |
| C  | -4.10057300 | -2.47358500 | -1.43083500 |
| H  | -4.63405700 | -1.55243400 | -1.19522900 |
| H  | -3.94632100 | -2.54657500 | -2.51184000 |
| C  | -4.91157400 | -3.67553900 | -0.94383200 |
| H  | -4.49280200 | -4.60475700 | -1.34541900 |
| H  | -5.91075000 | -3.54802300 | -1.38073500 |
| O  | -4.95957900 | -3.80092300 | 0.44871800  |
| H  | -5.58072300 | -3.10577900 | 0.76566500  |
| Cl | -6.52661200 | -1.19886100 | 0.70496000  |
| C  | -1.86545500 | -1.49156800 | -1.69258500 |
| H  | -0.89539800 | -1.34186000 | -1.20965700 |

|   |             |             |             |
|---|-------------|-------------|-------------|
| H | -1.73229700 | -2.01117900 | -2.64276000 |
| H | -2.36448100 | -0.52950300 | -1.84833100 |
| C | -2.82938600 | -1.63788000 | 0.52360700  |
| H | -3.57866600 | -2.15133600 | 1.12132600  |
| H | -1.84511400 | -1.66253400 | 0.99229800  |
| H | -3.13480600 | -0.60880200 | 0.32908500  |
| C | -2.08438300 | -3.67109100 | -0.60637800 |
| H | -2.04641300 | -4.18335000 | -1.56954000 |
| H | -1.08198200 | -3.49987900 | -0.21470600 |
| H | -2.68762900 | -4.23195400 | 0.10713800  |

H<sub>2</sub>O-A

0 1

|   |             |             |             |
|---|-------------|-------------|-------------|
| C | 2.39454000  | 2.39795200  | 1.95120000  |
| C | 2.48640700  | 1.03524800  | 1.27350500  |
| C | 0.71626700  | 0.07066400  | 2.83368200  |
| C | 0.95537400  | 1.30365200  | 3.70170600  |
| C | 1.13566800  | 2.52928100  | 2.80839700  |
| H | 2.71286600  | 1.05022300  | 0.20465500  |
| H | 3.58620900  | 0.32381800  | 1.51725500  |
| H | 3.28034200  | 2.57353500  | 2.57306800  |
| H | 2.40159900  | 3.17647800  | 1.18026100  |
| H | -0.30345000 | 0.10224200  | 2.41989800  |
| H | 0.79141000  | -0.87119200 | 3.38652200  |
| H | 0.09818900  | 1.43624500  | 4.36504200  |
| H | 1.84954600  | 1.16493400  | 4.32218700  |
| H | 0.25859700  | 2.59660600  | 2.15336900  |
| H | 1.17264600  | 3.44696400  | 3.40216400  |
| C | 1.61987800  | -0.00681000 | 1.64498000  |
| O | 1.61169000  | -1.13388600 | 1.00745700  |
| C | -0.11789200 | 1.00475300  | -0.95245400 |
| C | 0.30824400  | 2.32131800  | -1.01317600 |
| C | 1.45154300  | 2.72699400  | -1.69780400 |
| C | 2.20459500  | 1.75488300  | -2.33883600 |
| C | 1.79301500  | 0.41709300  | -2.30058000 |
| C | 0.63359500  | 0.04639800  | -1.62297100 |
| H | -1.01989400 | 0.73907400  | -0.41512900 |
| H | 1.72576600  | 3.77430400  | -1.71340300 |
| H | 3.11312900  | 2.00645000  | -2.87588000 |
| H | 0.29961800  | -0.98758500 | -1.62467300 |
| N | -0.48552800 | 3.33880400  | -0.31446800 |
| O | -0.15802700 | 4.50048700  | -0.42890900 |
| O | -1.42931700 | 2.95572900  | 0.36838700  |
| C | 2.60126200  | -0.62637300 | -2.98712000 |

|   |             |             |             |
|---|-------------|-------------|-------------|
| O | 3.61798600  | -0.38630700 | -3.59758200 |
| H | 2.20437500  | -1.65628900 | -2.91048500 |
| C | 9.72703800  | -1.29351300 | 0.51735000  |
| C | 8.47739100  | -1.23621500 | -0.35960800 |
| H | 10.63156300 | -1.16892500 | -0.08337800 |
| H | 9.70956300  | -0.49574000 | 1.26727100  |
| H | 9.80937200  | -2.24686800 | 1.04536500  |
| C | 7.16432800  | -1.21347000 | 0.43389900  |
| H | 8.52978300  | -0.33350000 | -0.97739600 |
| H | 8.47166200  | -2.09687800 | -1.04523000 |
| C | 5.95750300  | -1.24718800 | -0.50959900 |
| H | 7.10970700  | -0.26861300 | 0.98761100  |
| H | 5.86728900  | -2.26337700 | -0.93395400 |
| C | 7.07941400  | -2.37724300 | 1.42374000  |
| H | 6.10918600  | -2.39397500 | 1.92600700  |
| H | 7.22030900  | -3.33485000 | 0.90754600  |
| H | 7.84581600  | -2.29839100 | 2.19814800  |
| C | 4.64413400  | -0.97034000 | 0.21900200  |
| O | 4.66515500  | -0.39876300 | 1.34634500  |
| O | 3.58234100  | -1.28093600 | -0.40176100 |
| H | 2.46933400  | -1.19845300 | 0.31211800  |
| N | 6.03246700  | -0.20000600 | -1.53363700 |
| H | 6.81743500  | -0.39315500 | -2.14840800 |
| H | 5.20549500  | -0.25197900 | -2.12557200 |
| C | -4.85361600 | 1.78720500  | -2.17544700 |
| C | -3.51894100 | 2.17636500  | -1.55593500 |
| H | -5.03913700 | 2.36779200  | -3.08599300 |
| H | -4.83722700 | 0.72529400  | -2.43565500 |
| H | -3.55963000 | 3.21691100  | -1.20560200 |
| H | -3.34504800 | 1.53202600  | -0.68314500 |
| O | -2.46894700 | 2.08679400  | -2.48253000 |
| H | -2.30626300 | 1.13505600  | -2.60996400 |
| O | -5.92422800 | 1.96448600  | -1.23696700 |
| H | -6.06920400 | 2.91168100  | -1.12717000 |
| C | -4.26807900 | 1.65264600  | 1.82229700  |
| C | -2.96176700 | 0.95156200  | 2.15596800  |
| H | -4.76290200 | 1.97482200  | 2.74792000  |
| H | -4.04464900 | 2.55211700  | 1.23094100  |
| H | -3.16046700 | 0.05866000  | 2.75974300  |
| H | -2.48609300 | 0.60478800  | 1.22813200  |
| O | -2.11254300 | 1.78621600  | 2.91527700  |
| H | -1.83830400 | 2.50920700  | 2.33461600  |
| O | -5.09520100 | 0.76090500  | 1.09401700  |
| H | -5.47222000 | 1.22435400  | 0.32125500  |

|    |             |             |             |
|----|-------------|-------------|-------------|
| N  | -5.60775900 | -2.67709100 | 0.57215000  |
| C  | -4.10069900 | -2.68402100 | 0.80437300  |
| H  | -3.75572700 | -1.67960800 | 0.54759300  |
| H  | -3.94167600 | -2.84672500 | 1.87417300  |
| C  | -3.36086500 | -3.76600100 | 0.01519800  |
| H  | -3.55534300 | -4.74792200 | 0.46038400  |
| H  | -2.29812600 | -3.54102400 | 0.15450200  |
| O  | -3.72948100 | -3.84827100 | -1.33689200 |
| H  | -3.32191500 | -3.07889100 | -1.78864000 |
| Cl | -2.65759700 | -1.05230800 | -1.92350500 |
| C  | -6.26766900 | -2.02091500 | 1.74274600  |
| H  | -7.34197300 | -1.98358200 | 1.55291900  |
| H  | -6.06810700 | -2.61916100 | 2.63271800  |
| H  | -5.86634100 | -1.00996700 | 1.83669500  |
| C  | -5.92041000 | -1.87491800 | -0.66042800 |
| H  | -5.43766900 | -2.35472500 | -1.50772100 |
| H  | -7.00556300 | -1.84639500 | -0.77621300 |
| H  | -5.51373900 | -0.87445600 | -0.51488200 |
| C  | -6.14843800 | -4.05906800 | 0.41603000  |
| H  | -5.88275000 | -4.64092700 | 1.30022400  |
| H  | -7.23391800 | -3.99017900 | 0.33153300  |
| H  | -5.71775500 | -4.49884300 | -0.48239800 |
| O  | -1.26281800 | -1.54473000 | 0.86657800  |
| H  | -0.30512500 | -1.67966200 | 0.82220500  |
| H  | -1.55949500 | -1.38787100 | -0.04991600 |

## H<sub>2</sub>O-B

0 1

|   |             |             |             |
|---|-------------|-------------|-------------|
| C | 1.58340600  | -1.22464000 | 1.86332200  |
| C | 2.29760200  | -1.23152100 | 0.51540800  |
| C | 0.67284900  | -2.98023500 | -0.38793100 |
| C | 0.20690300  | -3.15210200 | 1.05815100  |
| C | 0.16798100  | -1.79592200 | 1.76459800  |
| H | 2.67790500  | -0.26627300 | 0.17619900  |
| H | 3.55942400  | -1.68829700 | 0.51399700  |
| H | 2.15149100  | -1.80935900 | 2.59732000  |
| H | 1.56568900  | -0.20048500 | 2.25348700  |
| H | -0.14412200 | -2.55232100 | -0.98934600 |
| H | 0.95361500  | -3.92382700 | -0.86592200 |
| H | -0.78300600 | -3.61386600 | 1.07353400  |
| H | 0.89226700  | -3.81807600 | 1.59743700  |
| H | -0.47260200 | -1.11127100 | 1.18732400  |
| H | -0.27378700 | -1.89581900 | 2.76178000  |
| C | 1.79963300  | -2.01109400 | -0.54436100 |

|   |             |             |             |
|---|-------------|-------------|-------------|
| O | 2.31638300  | -1.95466000 | -1.72843700 |
| C | 0.38188300  | 1.15232600  | -0.81814600 |
| C | 0.91013700  | 1.80827400  | 0.28461400  |
| C | 2.20149800  | 2.33273600  | 0.32689300  |
| C | 2.99703100  | 2.19720800  | -0.80086000 |
| C | 2.48842800  | 1.54469500  | -1.93174500 |
| C | 1.19543000  | 1.02447700  | -1.94006500 |
| H | -0.61147700 | 0.71426400  | -0.78545400 |
| H | 2.56304500  | 2.80487800  | 1.23187800  |
| H | 4.02788400  | 2.53827300  | -0.80755100 |
| H | 0.82371000  | 0.48843400  | -2.80901100 |
| N | 0.08909000  | 1.87996100  | 1.49664000  |
| O | 0.56966300  | 2.37069900  | 2.49778900  |
| O | -1.04758700 | 1.42117800  | 1.43674400  |
| C | 3.34665400  | 1.38531800  | -3.13895400 |
| O | 4.40479900  | 1.94937500  | -3.28458800 |
| H | 2.93783600  | 0.71455700  | -3.92057500 |
| C | 9.22682800  | 0.42346900  | 2.18981500  |
| C | 8.42605000  | 0.56372000  | 0.89669800  |
| H | 9.93036700  | 1.25194400  | 2.30546900  |
| H | 8.56032400  | 0.42555400  | 3.05884800  |
| H | 9.80226000  | -0.50532500 | 2.21338400  |
| C | 7.29109400  | -0.46026200 | 0.76080900  |
| H | 7.99597500  | 1.56941000  | 0.85482100  |
| H | 9.10507900  | 0.46691400  | 0.03561900  |
| C | 6.56422200  | -0.30317900 | -0.58420700 |
| H | 6.55788900  | -0.26402200 | 1.55349300  |
| H | 7.16219700  | -0.82422400 | -1.35664100 |
| C | 7.81238200  | -1.89177300 | 0.91032200  |
| H | 7.02730600  | -2.61882700 | 0.69803900  |
| H | 8.64772400  | -2.06575500 | 0.22036000  |
| H | 8.17289100  | -2.07917100 | 1.92458200  |
| C | 5.19103200  | -0.98345100 | -0.59921600 |
| O | 4.84458600  | -1.71235200 | 0.38066400  |
| O | 4.46164500  | -0.74291200 | -1.59803200 |
| H | 3.22285600  | -1.40533600 | -1.70916600 |
| N | 6.31307800  | 1.10046400  | -0.92600800 |
| H | 7.19684000  | 1.55785800  | -1.12908100 |
| H | 5.77399600  | 1.12931900  | -1.78913600 |
| C | -4.12389100 | 3.55409100  | -0.80167900 |
| C | -3.08552000 | 2.45033100  | -0.90992900 |
| H | -3.98145300 | 4.29410700  | -1.59798400 |
| H | -5.12019900 | 3.11946700  | -0.92624100 |
| H | -2.07212300 | 2.88491100  | -0.83451600 |

|                   |             |             |             |
|-------------------|-------------|-------------|-------------|
| H                 | -3.19991000 | 1.76733500  | -0.05586700 |
| O                 | -3.28932900 | 1.80263600  | -2.13916500 |
| H                 | -2.88900700 | 0.91668800  | -2.06370800 |
| O                 | -4.12146900 | 4.17185500  | 0.48054200  |
| H                 | -3.23625600 | 4.50816200  | 0.66238800  |
| C                 | -4.00290700 | 1.62021800  | 2.62693800  |
| C                 | -3.58973800 | 0.18471600  | 2.35938800  |
| H                 | -4.29146600 | 1.73653800  | 3.67959800  |
| H                 | -3.15250300 | 2.28539300  | 2.42841100  |
| H                 | -4.44476600 | -0.47674100 | 2.54137100  |
| H                 | -3.30122600 | 0.08361200  | 1.30157200  |
| O                 | -2.55130800 | -0.25651500 | 3.21065500  |
| H                 | -1.75982600 | 0.23786400  | 2.95157200  |
| O                 | -5.08818500 | 1.91994500  | 1.76199000  |
| H                 | -4.95709200 | 2.83125700  | 1.45086400  |
| N                 | -6.48118900 | -0.85654300 | -0.53081300 |
| C                 | -5.55339300 | -1.88303800 | 0.10527100  |
| H                 | -4.67229800 | -1.33574900 | 0.43573400  |
| H                 | -6.06475000 | -2.28208600 | 0.98591800  |
| C                 | -5.15386900 | -3.03867600 | -0.81239100 |
| H                 | -5.99507400 | -3.72930500 | -0.93602400 |
| H                 | -4.36430600 | -3.57059100 | -0.26708500 |
| O                 | -4.75741100 | -2.64206400 | -2.09881700 |
| H                 | -3.86337800 | -2.25047500 | -2.02033300 |
| Cl                | -2.32502900 | -1.02044000 | -1.14835200 |
| C                 | -7.22822700 | -0.14885500 | 0.55342200  |
| H                 | -7.86670800 | 0.60653200  | 0.09150100  |
| H                 | -7.83878600 | -0.87553500 | 1.09067400  |
| H                 | -6.51157600 | 0.34331100  | 1.21470600  |
| C                 | -5.65884800 | 0.16551300  | -1.26729800 |
| H                 | -5.04193400 | -0.34637300 | -1.99957300 |
| H                 | -6.34070800 | 0.87093100  | -1.74649900 |
| H                 | -5.03774600 | 0.67605600  | -0.53008900 |
| C                 | -7.45087700 | -1.49673900 | -1.46622300 |
| H                 | -8.00991100 | -2.26054500 | -0.92283500 |
| H                 | -8.13296200 | -0.72636100 | -1.82834300 |
| H                 | -6.89168300 | -1.93776700 | -2.29031800 |
| O                 | -3.00280900 | -2.63350200 | 1.57242000  |
| H                 | -2.69115700 | -2.10283200 | 2.32229300  |
| H                 | -2.61058800 | -2.18972200 | 0.80038900  |
| 2H <sub>2</sub> O |             |             |             |
| 0 1               |             |             |             |
| C                 | 2.41134000  | 1.80600500  | 2.48508200  |



|   |             |             |             |
|---|-------------|-------------|-------------|
| C | 2.49962100  | 0.62263600  | 1.52767900  |
| C | 0.70944500  | -0.64273300 | 2.82628000  |
| C | 0.95703000  | 0.36346800  | 3.94800000  |
| C | 1.15180700  | 1.75468800  | 3.34952200  |
| H | 2.73385800  | 0.86707300  | 0.48900500  |
| H | 3.59265000  | -0.13638500 | 1.60732700  |
| H | 3.29657700  | 1.83747200  | 3.13123800  |
| H | 2.41935900  | 2.73397200  | 1.90334300  |
| H | -0.30542700 | -0.50464200 | 2.42311000  |
| H | 0.76717800  | -1.68519300 | 3.15557900  |
| H | 0.09855400  | 0.35524600  | 4.62307200  |
| H | 1.84663200  | 0.07973300  | 4.52409000  |
| H | 0.27250900  | 1.97311200  | 2.73254700  |
| H | 1.19526400  | 2.51864600  | 4.13066700  |
| C | 1.62225600  | -0.46606400 | 1.65426500  |
| O | 1.60945700  | -1.42365900 | 0.78175400  |
| C | -0.11320000 | 1.12790500  | -0.70550400 |
| C | 0.39484800  | 2.37800600  | -0.39439700 |
| C | 1.57000400  | 2.88604600  | -0.94394500 |
| C | 2.27672100  | 2.08462200  | -1.82520500 |
| C | 1.79832400  | 0.80530100  | -2.14088000 |
| C | 0.60650000  | 0.33550700  | -1.59617600 |
| H | -1.03498700 | 0.77317500  | -0.25994400 |
| H | 1.89975000  | 3.87978500  | -0.66805800 |
| H | 3.20613200  | 2.41942800  | -2.27421600 |
| H | 0.22159500  | -0.64469300 | -1.86641200 |
| N | -0.31613200 | 3.18901400  | 0.60127300  |
| O | 0.24389200  | 4.16079400  | 1.05458000  |
| O | -1.42390700 | 2.79997700  | 0.95629200  |
| C | 2.57098700  | -0.06893600 | -3.06175700 |
| O | 3.60480900  | 0.26808000  | -3.59306200 |
| H | 2.13055100  | -1.06816000 | -3.24248000 |
| C | 9.73105100  | -1.38275600 | 0.21959700  |
| C | 8.46959600  | -1.16015500 | -0.61286800 |
| H | 10.62550200 | -1.10978200 | -0.34613400 |
| H | 9.70804500  | -0.77047700 | 1.12719300  |
| H | 9.83780800  | -2.42709300 | 0.52361900  |
| C | 7.16644800  | -1.33995700 | 0.17685900  |
| H | 8.49666300  | -0.14288500 | -1.01752900 |
| H | 8.47129100  | -1.84904700 | -1.47100000 |
| C | 5.94894300  | -1.19060600 | -0.74121900 |
| H | 7.10140100  | -0.54143300 | 0.92554100  |
| H | 5.86906800  | -2.09304500 | -1.37388700 |
| C | 7.11566000  | -2.69446100 | 0.88687800  |

|    |             |             |             |
|----|-------------|-------------|-------------|
| H  | 6.15150500  | -2.84229000 | 1.37909300  |
| H  | 7.27003300  | -3.51165700 | 0.17152200  |
| H  | 7.88893100  | -2.77124300 | 1.65469300  |
| C  | 4.63940900  | -1.09820600 | 0.03921500  |
| O  | 4.66526500  | -0.80685300 | 1.26951000  |
| O  | 3.57600500  | -1.25747500 | -0.63284700 |
| H  | 2.46412400  | -1.33472300 | 0.08647000  |
| N  | 5.99523100  | 0.05314000  | -1.51740500 |
| H  | 6.77303500  | 0.00827500  | -2.16895400 |
| H  | 5.15988400  | 0.11371500  | -2.09660200 |
| C  | -4.87825900 | 1.99029100  | -1.88802600 |
| C  | -3.46582900 | 2.22391600  | -1.37456000 |
| H  | -5.08317800 | 2.64810300  | -2.74037500 |
| H  | -4.97862700 | 0.95316200  | -2.22074700 |
| H  | -3.36921600 | 3.23018500  | -0.94668100 |
| H  | -3.24444100 | 1.49185500  | -0.58704700 |
| O  | -2.53895900 | 2.13529100  | -2.43536700 |
| H  | -2.36943200 | 1.18485300  | -2.58275100 |
| O  | -5.85019000 | 2.18678000  | -0.85565400 |
| H  | -5.82798300 | 3.11664400  | -0.59911000 |
| C  | -4.19782000 | 1.26503000  | 1.98018500  |
| C  | -2.92955500 | 0.48903200  | 2.28966400  |
| H  | -4.73234200 | 1.48566400  | 2.91422000  |
| H  | -3.92225400 | 2.22232500  | 1.51406900  |
| H  | -3.18618200 | -0.47572900 | 2.74358600  |
| H  | -2.40122000 | 0.26501500  | 1.35249300  |
| O  | -2.11796100 | 1.17907200  | 3.21538000  |
| H  | -1.84113500 | 2.00055100  | 2.78456500  |
| O  | -4.99901900 | 0.49135000  | 1.10293600  |
| H  | -5.43651100 | 1.09425500  | 0.47065300  |
| N  | -5.53150700 | -2.87752400 | 0.26656600  |
| C  | -4.01656100 | -2.89747900 | 0.43664800  |
| H  | -3.68707600 | -1.86726200 | 0.28398400  |
| H  | -3.81269800 | -3.17925800 | 1.47353200  |
| C  | -3.30459300 | -3.87541200 | -0.49962700 |
| H  | -3.47825400 | -4.90367500 | -0.16413500 |
| H  | -2.23857600 | -3.65862900 | -0.37671400 |
| O  | -3.72565700 | -3.80431100 | -1.83772800 |
| H  | -3.32696600 | -2.99427800 | -2.21721600 |
| Cl | -2.64498100 | -0.94698500 | -2.12100400 |
| C  | -6.14578300 | -2.35297200 | 1.52509500  |
| H  | -7.22764400 | -2.31066400 | 1.38580400  |
| H  | -5.90227200 | -3.03539100 | 2.34037800  |
| H  | -5.74977300 | -1.35122100 | 1.70360100  |

|   |             |             |             |
|---|-------------|-------------|-------------|
| C | -5.89392800 | -1.95046000 | -0.85984900 |
| H | -5.44906600 | -2.33783800 | -1.77263800 |
| H | -6.98297900 | -1.91186400 | -0.92603100 |
| H | -5.47700400 | -0.97144900 | -0.62430900 |
| C | -6.07358600 | -4.23872100 | -0.01439100 |
| H | -5.77007400 | -4.90976300 | 0.79092000  |
| H | -7.16185200 | -4.16995400 | -0.04773400 |
| H | -5.67894600 | -4.57723300 | -0.97127500 |
| O | -1.23369700 | -1.76093400 | 0.56970300  |
| H | -0.27742800 | -1.89559500 | 0.49794600  |
| H | -1.53292800 | -1.47584700 | -0.31411600 |
| O | -1.22796800 | 4.39250000  | -1.60880900 |
| H | -1.50034200 | 3.59649300  | -2.09980200 |
| H | -0.96137000 | 5.02989900  | -2.27683100 |

H<sub>2</sub>O-A-H

0 1

|   |             |             |             |
|---|-------------|-------------|-------------|
| C | 2.00520500  | -3.06818400 | -0.25452900 |
| C | 2.18664700  | -1.57391300 | -0.49626700 |
| C | 0.58801700  | -1.64239500 | -2.48184100 |
| C | 0.72164200  | -3.16139100 | -2.40492600 |
| C | 0.74938300  | -3.60435400 | -0.94184500 |
| H | 2.35900400  | -0.96519400 | 0.39333600  |
| H | 3.36619900  | -1.23420400 | -1.01462400 |
| H | 2.87779000  | -3.62644400 | -0.61568100 |
| H | 1.95002800  | -3.24049900 | 0.82455700  |
| H | -0.45099700 | -1.34593500 | -2.27953200 |
| H | 0.83101200  | -1.24290500 | -3.47190900 |
| H | -0.11406600 | -3.61444500 | -2.94286600 |
| H | 1.64909000  | -3.48672300 | -2.89252500 |
| H | -0.13371900 | -3.19441700 | -0.42973200 |
| H | 0.70519700  | -4.69506900 | -0.86092400 |
| C | 1.42254400  | -0.91603700 | -1.47321600 |
| O | 1.46366500  | 0.37000900  | -1.60516800 |
| C | 0.52797900  | -0.72043200 | 2.53049800  |
| C | 1.64038400  | -1.41093300 | 3.00669100  |
| C | 2.91067500  | -0.82575500 | 2.97204100  |
| C | 3.07311100  | 0.46416100  | 2.48197400  |
| C | 1.95103400  | 1.16605600  | 2.02332100  |
| C | 0.68742600  | 0.57390700  | 2.03895300  |
| H | -0.45868700 | -1.17447600 | 2.55683600  |
| H | 3.77260100  | -1.38034200 | 3.32911700  |
| H | 4.05463800  | 0.92725300  | 2.42279300  |
| H | -0.18403400 | 1.12004200  | 1.68489000  |
| C | 2.07591300  | 2.55678700  | 1.53312000  |

|   |             |             |             |
|---|-------------|-------------|-------------|
| O | 3.09679700  | 3.20826200  | 1.53983400  |
| H | 1.12912200  | 2.99821100  | 1.15562500  |
| C | 9.55568600  | -0.08108000 | -0.01788200 |
| C | 8.31698600  | 0.80859400  | 0.06606100  |
| H | 10.36414500 | 0.31537100  | 0.60182500  |
| H | 9.32887800  | -1.09304800 | 0.33421600  |
| H | 9.93156600  | -0.16054800 | -1.04112600 |
| C | 7.08448800  | 0.21763100  | -0.63106900 |
| H | 8.07244700  | 0.97790900  | 1.11917300  |
| H | 8.54412900  | 1.79154400  | -0.37460600 |
| C | 5.89484700  | 1.18711100  | -0.55220800 |
| H | 6.79509700  | -0.69644200 | -0.09703500 |
| H | 6.02392500  | 1.94985200  | -1.34485600 |
| C | 7.38414100  | -0.13163800 | -2.09094600 |
| H | 6.47899100  | -0.44430600 | -2.61391700 |
| H | 7.80642200  | 0.73750300  | -2.61095100 |
| H | 8.10733900  | -0.94746000 | -2.16399600 |
| C | 4.55828600  | 0.51049500  | -0.86714800 |
| O | 4.53685600  | -0.69908900 | -1.23606800 |
| O | 3.53177400  | 1.23368000  | -0.71887200 |
| H | 2.38674500  | 0.79213100  | -1.12447000 |
| N | 5.74384800  | 1.78001000  | 0.77677900  |
| H | 6.49829800  | 2.43934800  | 0.94034800  |
| H | 4.87691200  | 2.31595800  | 0.81212900  |
| C | -5.11844000 | -1.61107100 | 2.61930200  |
| C | -3.74751800 | -2.23641200 | 2.39528400  |
| H | -5.42850600 | -1.74489200 | 3.66193900  |
| H | -5.05402600 | -0.53988300 | 2.40967800  |
| H | -3.79614400 | -3.31877400 | 2.57800600  |
| H | -3.46320100 | -2.07492800 | 1.34556100  |
| O | -2.80583400 | -1.69755800 | 3.28293800  |
| H | -2.63706900 | -0.79057300 | 2.96744300  |
| O | -6.10390300 | -2.13997300 | 1.72759300  |
| H | -6.21522800 | -3.07917900 | 1.91394300  |
| C | -4.58145700 | -2.38417100 | -1.23356300 |
| C | -3.18718100 | -1.85257800 | -1.52472100 |
| H | -4.98947200 | -2.84619000 | -2.14176200 |
| H | -4.51781400 | -3.17129500 | -0.46679700 |
| H | -3.23047500 | -1.07528800 | -2.29391100 |
| H | -2.76774600 | -1.37881400 | -0.62635800 |
| O | -2.35681500 | -2.88336100 | -2.03273400 |
| H | -2.12317000 | -3.46793300 | -1.30264700 |
| O | -5.41929900 | -1.33306300 | -0.79132000 |
| H | -5.79054600 | -1.59371400 | 0.07290300  |

|    |             |             |             |
|----|-------------|-------------|-------------|
| N  | -5.61523100 | 2.19224300  | -1.25257700 |
| C  | -4.11586200 | 2.05920400  | -1.49232600 |
| H  | -3.82773800 | 1.10645500  | -1.04403200 |
| H  | -3.96723700 | 2.00212100  | -2.57420900 |
| C  | -3.29218700 | 3.21734300  | -0.92909600 |
| H  | -3.43577300 | 4.11372200  | -1.54205500 |
| H  | -2.25116800 | 2.89702300  | -1.03919100 |
| O  | -3.61968100 | 3.56624900  | 0.39194700  |
| H  | -3.26290000 | 2.85400200  | 0.96164300  |
| Cl | -2.76107800 | 0.76569000  | 1.35546800  |
| C  | -6.32586200 | 1.30814700  | -2.22624500 |
| H  | -7.39913600 | 1.39065100  | -2.04528500 |
| H  | -6.09151000 | 1.64321300  | -3.23728800 |
| H  | -5.99629800 | 0.28168300  | -2.05333500 |
| C  | -5.95573800 | 1.72541400  | 0.13596900  |
| H  | -5.47010500 | 2.39010600  | 0.84482500  |
| H  | -7.04256600 | 1.75056100  | 0.23819300  |
| H  | -5.56954000 | 0.71213300  | 0.24370800  |
| C  | -6.07162500 | 3.60023500  | -1.42827900 |
| H  | -5.78715000 | 3.94039700  | -2.42555100 |
| H  | -7.15735200 | 3.62327400  | -1.32356500 |
| H  | -5.59888400 | 4.21198900  | -0.66074200 |
| O  | -1.41857500 | 0.78809300  | -1.57558700 |
| H  | -0.46127000 | 0.91280200  | -1.65257400 |
| H  | -1.58954000 | 0.66624200  | -0.62478900 |
| H  | 1.52047000  | -2.41451800 | 3.40464200  |

## H<sub>2</sub>O-A-Cl

0 1

|   |             |             |            |
|---|-------------|-------------|------------|
| C | -2.38483700 | -2.14360800 | 2.31217200 |
| C | -2.45214700 | -0.87838200 | 1.46407000 |
| C | -0.69885400 | 0.26740100  | 2.91350100 |
| C | -0.98452500 | -0.82819400 | 3.93889900 |
| C | -1.15966700 | -2.16860000 | 3.22704600 |
| H | -2.66297400 | -1.02698400 | 0.40219300 |
| H | -3.55516600 | -0.14007600 | 1.60537500 |
| H | -3.29556500 | -2.24161600 | 2.91534800 |
| H | -2.36303200 | -3.01128200 | 1.64358500 |
| H | 0.31953700  | 0.14665700  | 2.51371100 |
| H | -0.75978800 | 1.27779300  | 3.33020900 |
| H | -0.15675500 | -0.87519300 | 4.65151200 |
| H | -1.89280300 | -0.58832200 | 4.50619600 |
| H | -0.26076900 | -2.35549400 | 2.62891800 |
| H | -1.24647100 | -2.98491900 | 3.95038800 |

|   |              |             |             |
|---|--------------|-------------|-------------|
| C | -1.58555200  | 0.19710500  | 1.71323400  |
| O | -1.55730700  | 1.23496200  | 0.93807700  |
| C | 0.12031200   | -1.26470300 | -0.75243000 |
| C | -0.38554600  | -2.55663500 | -0.71045500 |
| C | -1.55912000  | -2.92140100 | -1.36988000 |
| C | -2.24025700  | -1.95592300 | -2.09727700 |
| C | -1.73797100  | -0.65260400 | -2.17077200 |
| C | -0.56143000  | -0.31441400 | -1.50611000 |
| H | 1.02122500   | -0.99271200 | -0.21134200 |
| H | -1.91960200  | -3.94192800 | -1.30925100 |
| H | -3.16245700  | -2.19130200 | -2.61917700 |
| H | -0.15858000  | 0.69206700  | -1.58215000 |
| C | -2.45504900  | 0.37759900  | -2.95816100 |
| O | -3.47838100  | 0.16677900  | -3.57138300 |
| H | -1.98192900  | 1.37891800  | -2.96201700 |
| C | -9.69745800  | 1.14802300  | 0.27552100  |
| C | -8.41831700  | 1.06149300  | -0.55526200 |
| H | -10.57659000 | 0.93321500  | -0.33741400 |
| H | -9.67496000  | 0.42298600  | 1.09591500  |
| H | -9.83265500  | 2.14125300  | 0.71111500  |
| C | -7.13208600  | 1.16138600  | 0.27518100  |
| H | -8.41648900  | 0.10581400  | -1.08990000 |
| H | -8.42142800  | 1.85691300  | -1.31566500 |
| C | -5.89686900  | 1.15477900  | -0.63145800 |
| H | -7.06298200  | 0.27368600  | 0.91522900  |
| H | -5.82479300  | 2.13346600  | -1.13945400 |
| C | -7.12127800  | 2.41282900  | 1.15554600  |
| H | -6.16874200  | 2.51288900  | 1.68123800  |
| H | -7.28007700  | 3.31300400  | 0.54901900  |
| H | -7.90894500  | 2.37539700  | 1.91164100  |
| C | -4.59855200  | 0.98552500  | 0.15514600  |
| O | -4.63846400  | 0.53870100  | 1.33790000  |
| O | -3.52952600  | 1.24817100  | -0.47206600 |
| H | -2.41751200  | 1.22892400  | 0.24045200  |
| N | -5.90551900  | 0.02285800  | -1.56425600 |
| H | -6.67153900  | 0.14169000  | -2.22055400 |
| H | -5.05876300  | 0.05261400  | -2.12999700 |
| C | 4.74881900   | -2.16879900 | -1.93306700 |
| C | 3.35891900   | -2.64113100 | -1.52212900 |
| H | 5.04597700   | -2.65797700 | -2.86794600 |
| H | 4.72630900   | -1.08880800 | -2.09738100 |
| H | 3.37364500   | -3.72214900 | -1.32636200 |
| H | 3.08288600   | -2.14261000 | -0.57871900 |
| O | 2.42038400   | -2.41125100 | -2.53300000 |

|    |            |             |             |
|----|------------|-------------|-------------|
| H  | 2.29511100 | -1.44675100 | -2.58127000 |
| O  | 5.72043300 | -2.40587100 | -0.90995800 |
| H  | 5.80404800 | -3.35719600 | -0.77881400 |
| C  | 4.39495600 | -1.55909300 | 1.93023500  |
| C  | 3.13323800 | -0.73377200 | 1.72066300  |
| H  | 4.56074700 | -1.72909500 | 2.99982200  |
| H  | 4.25942300 | -2.54427500 | 1.45894300  |
| H  | 3.17624000 | 0.19510500  | 2.29907400  |
| H  | 3.06199200 | -0.44727700 | 0.66001200  |
| O  | 1.98543400 | -1.43006400 | 2.16488300  |
| H  | 1.83819300 | -2.18894300 | 1.58320400  |
| O  | 5.51857400 | -0.89828000 | 1.37772900  |
| H  | 5.72986900 | -1.35924100 | 0.54415800  |
| N  | 5.59163000 | 2.68755400  | 0.40504100  |
| C  | 4.07934500 | 2.76832100  | 0.56726800  |
| H  | 3.71106100 | 1.74932700  | 0.44547000  |
| H  | 3.88099200 | 3.09343200  | 1.59231900  |
| C  | 3.39245300 | 3.72389800  | -0.40946600 |
| H  | 3.58745000 | 4.76155600  | -0.11757900 |
| H  | 2.32176900 | 3.53218000  | -0.27771700 |
| O  | 3.81250100 | 3.58495400  | -1.74171100 |
| H  | 3.40248900 | 2.76226700  | -2.08226400 |
| Cl | 2.73049400 | 0.72124000  | -1.88455100 |
| C  | 6.17961100 | 2.17778100  | 1.68168600  |
| H  | 7.26114200 | 2.10262900  | 1.55531000  |
| H  | 5.94424300 | 2.88201800  | 2.48035900  |
| H  | 5.76932100 | 1.18525300  | 1.87773100  |
| C  | 5.93240600 | 1.71029700  | -0.68555000 |
| H  | 5.47873600 | 2.05787100  | -1.60962400 |
| H  | 7.02043400 | 1.66094100  | -0.76122000 |
| H  | 5.51970600 | 0.74272800  | -0.39874200 |
| C  | 6.17798300 | 4.02073700  | 0.08331000  |
| H  | 5.89007800 | 4.72758300  | 0.86342000  |
| H  | 7.26374600 | 3.91832500  | 0.05865900  |
| H  | 5.79768100 | 4.33761800  | -0.88694200 |
| O  | 1.32078000 | 1.63278900  | 0.79904000  |
| H  | 0.35800500 | 1.73131600  | 0.75964100  |
| H  | 1.59026900 | 1.29057000  | -0.07299100 |
| Cl | 0.47831100 | -3.78143700 | 0.19360700  |

H<sub>2</sub>O-A-Br

0 1

|   |             |             |            |
|---|-------------|-------------|------------|
| C | -2.70849400 | -2.35116900 | 2.01426500 |
| C | -2.73806700 | -1.05616400 | 1.21048900 |

|   |              |             |             |
|---|--------------|-------------|-------------|
| C | -0.82682800  | -0.08848200 | 2.59155100  |
| C | -1.07895400  | -1.23464200 | 3.56777800  |
| C | -1.40637300  | -2.51434200 | 2.79930600  |
| H | -3.00634700  | -1.15424700 | 0.15661500  |
| H | -3.78561200  | -0.25216400 | 1.41569300  |
| H | -3.55741800  | -2.38600700 | 2.70775600  |
| H | -2.83718800  | -3.19312800 | 1.32655400  |
| H | 0.16518700   | -0.19878000 | 2.12968100  |
| H | -0.81649600  | 0.89425900  | 3.07402500  |
| H | -0.18826100  | -1.36538100 | 4.18622900  |
| H | -1.91779200  | -0.98762200 | 4.23039600  |
| H | -0.59364900  | -2.73329400 | 2.09452100  |
| H | -1.47912200  | -3.36691400 | 3.48126500  |
| C | -1.79010800  | -0.04741700 | 1.44864000  |
| O | -1.74686400  | 1.02309500  | 0.72292900  |
| C | 0.33269000   | -1.08677800 | -0.98750400 |
| C | 0.09169300   | -2.43102800 | -0.75316200 |
| C | -1.04581900  | -3.08616300 | -1.22211600 |
| C | -1.97434700  | -2.35334400 | -1.94711700 |
| C | -1.75584800  | -0.99301200 | -2.19561800 |
| C | -0.60305300  | -0.36738400 | -1.72465700 |
| H | 1.23786400   | -0.60637900 | -0.63630100 |
| H | -1.18826700  | -4.14214200 | -1.02341900 |
| H | -2.88103300  | -2.81231500 | -2.32910300 |
| H | -0.41241300  | 0.68261100  | -1.93586300 |
| C | -2.76982600  | -0.20767400 | -2.94050400 |
| O | -3.80633600  | -0.67892400 | -3.35431900 |
| H | -2.52070900  | 0.85952600  | -3.09340500 |
| C | -9.83441100  | 1.72386900  | 0.48654400  |
| C | -8.62196900  | 1.53013200  | -0.42235000 |
| H | -10.76524600 | 1.63284800  | -0.07910300 |
| H | -9.84793500  | 0.96801800  | 1.27881500  |
| H | -9.83189200  | 2.70745900  | 0.96316300  |
| C | -7.28803300  | 1.45549300  | 0.33158500  |
| H | -8.75495600  | 0.60192100  | -0.98771600 |
| H | -8.57881100  | 2.35104600  | -1.15408500 |
| C | -6.11720100  | 1.33923000  | -0.65025300 |
| H | -7.28478200  | 0.54337000  | 0.94031300  |
| H | -5.96107200  | 2.32209200  | -1.13142900 |
| C | -7.08309800  | 2.66626400  | 1.24430600  |
| H | -6.09757900  | 2.63955700  | 1.71538300  |
| H | -7.17052400  | 3.59919700  | 0.67381800  |
| H | -7.82643700  | 2.69270500  | 2.04445000  |
| C | -4.80208100  | 1.00157000  | 0.04902100  |



|    |             |             |             |
|----|-------------|-------------|-------------|
| O  | -4.81906900 | 0.52148300  | 1.21891500  |
| O  | -3.74792100 | 1.17582300  | -0.63348000 |
| H  | -2.62273200 | 1.08182100  | 0.04845800  |
| N  | -6.31571300 | 0.25078100  | -1.61075400 |
| H  | -7.07142600 | 0.49579500  | -2.24290000 |
| H  | -5.48567500 | 0.14787400  | -2.19261200 |
| C  | 5.07104100  | -1.23245700 | -2.19046800 |
| C  | 3.75819000  | -1.82611500 | -1.69946900 |
| H  | 5.38405000  | -1.71754800 | -3.12164200 |
| H  | 4.93665900  | -0.16454900 | -2.38220900 |
| H  | 3.90947100  | -2.87752800 | -1.41851600 |
| H  | 3.45334900  | -1.27551800 | -0.79547100 |
| O  | 2.77118500  | -1.79346800 | -2.69071900 |
| H  | 2.50355200  | -0.86100900 | -2.77676200 |
| O  | 6.09518300  | -1.34876100 | -1.19161100 |
| H  | 6.36482000  | -2.27362900 | -1.14875200 |
| C  | 4.17740200  | -1.33614100 | 1.81040400  |
| C  | 2.84484600  | -0.69777400 | 2.16401700  |
| H  | 4.68401500  | -1.66360100 | 2.72806300  |
| H  | 3.99107800  | -2.22483900 | 1.19000800  |
| H  | 3.02018400  | 0.22659900  | 2.72575400  |
| H  | 2.32011100  | -0.40207000 | 1.24446600  |
| O  | 2.06449500  | -1.54178500 | 2.98551100  |
| H  | 1.72302400  | -2.24943800 | 2.42291700  |
| O  | 4.95457500  | -0.38043000 | 1.11186100  |
| H  | 5.43046400  | -0.80504000 | 0.37221100  |
| N  | 5.29065600  | 3.08860100  | 0.63278500  |
| C  | 3.77536600  | 2.99589600  | 0.77961000  |
| H  | 3.51048400  | 1.97491100  | 0.49551700  |
| H  | 3.54607300  | 3.13426700  | 1.83996900  |
| C  | 3.01245600  | 4.03772700  | -0.04093900 |
| H  | 3.11680700  | 5.02430700  | 0.42390800  |
| H  | 1.96085000  | 3.74187500  | 0.03453200  |
| O  | 3.45201900  | 4.16065100  | -1.36871800 |
| H  | 3.10777900  | 3.38078900  | -1.85326000 |
| Cl | 2.56388200  | 1.31884700  | -2.04259500 |
| C  | 5.92569100  | 2.46801600  | 1.83565800  |
| H  | 7.00899600  | 2.49703200  | 1.70423200  |
| H  | 5.64220500  | 3.04791600  | 2.71493200  |
| H  | 5.58220200  | 1.43422600  | 1.90632600  |
| C  | 5.72157900  | 2.31688200  | -0.58311000 |
| H  | 5.24379100  | 2.76179500  | -1.45229000 |
| H  | 6.81006400  | 2.37015600  | -0.64783000 |
| H  | 5.38694300  | 1.28761700  | -0.45603900 |

|    |            |             |             |
|----|------------|-------------|-------------|
| C  | 5.74919500 | 4.50356000  | 0.51231900  |
| H  | 5.39623200 | 5.06112400  | 1.38149000  |
| H  | 6.83994200 | 4.50499900  | 0.49054400  |
| H  | 5.34298500 | 4.92097900  | -0.40784800 |
| O  | 1.06682500 | 1.67349100  | 0.71704300  |
| H  | 0.10041200 | 1.69845900  | 0.65651800  |
| H  | 1.38330900 | 1.55298800  | -0.19781300 |
| Br | 1.38866600 | -3.43382200 | 0.20477400  |
